# Supplementary material for: Network-based pharmacology and UHPLC-Q-Exactive-Orbitrap-MS reveal Jinhua Qinggan granule's mechanism in reducing cellular inflammation in COVID-19
Source: Front Immunol. 2024 Jul 4;15:1382524. doi: 10.3389/fimmu.2024.1382524 (PMC11254672; doi:10.3389/fimmu.2024.1382524)
Supplement: Supplementary file 1 [file Table_1.xlsx]

## Sheet: Sheet1
No.	R.T. min	Classification	Name	Formula	M.W.	Molecular ion peak and fragment (m/z )	Resource
1	0.49	Sugar	D-Gluconic acid	C6H12O7		195.0503, 177.0395, 159.0290, 129.0183, 99.0076, 87.0076, 75.0076
2	0.52	Aliphatic acid	quinic acid	C7H12O6	192.17	191.0552, 173.0446, 155.0340, 127.0390, 109.0284, 99.0440, 93.0334, 85.0283, 81.0334, 71.0127, 67.0177	Lianqiao [33]
3	1.33	Phenolic acid ester	Danshensu	C9H10O5	198.17	197.0453, 179.0343, 135.0442, 123.0442, 109.0284, 99.9244, 95.0488, 89.0383, 72.9919	Danshen (confidential addition) [13]
4	1.47	Alkaloid	sophocarpine	C15H22N2O	246.35	247.1802, 245.1647, 229.1693, 186.1151, 179.1541, 174.0914, 150.1279, 138.1277, 136.1120, 134.0959, 122.0965, 110.0969, 108.0811, 98.0967
5	1.6	Phenolic acid	protocatechuic acid	C7H6O4	154.12	154.0220, 153.0185, 110.0317, 109.0285, 108.0207, 91.0178, 81.0334, 65.0021	Jinyinhua [36], Mahuang [37,38],Lianqiao [39]
6	1.76	Caffeoylquinic acid	neochlorogenic acid (5-O-caffeoylquinic acid)	C16H18O9	354.311	353.0876, 191.0555, 179.0341, 173.0447, 161.0240, 135.0443, 127.0390, 107.0491, 93.0335, 85.0284, 81.0333	Kuxingren [40], Jinyinhua [36],Niubangzi [41,42],
7	1.84	Amino acid	L-tryptophan	C11H12N2O2	204	203.0822, 159.0916, 142.0653, 130.0649, 116.0496, 74.0236, 72.0078	Mahuang [37,38]
8	3	Glycoside	salidroside	C14H20O7	300.304	299.1126, 179.0560, 137.0235, 119.0492, 113.0231, 101.0231, 89.0233, 85.0281, 71.0127	Huangqin [44–46], Lianqiao [33,39],
9	3.85	Caffeoylquinic acid	chlorogenic acid*	C16H18O9	354.31	353.0873, 191.0554, 173.0446, 161.0236, 109.0285, 93.0335, 85.0283, 81.0333	Jinyinhua [36], Mahuang [37,38], Niubangzi [41,42], Kuxingren [40], Lianqiao [33,39] [33,39], Huangqin [44–46],
10	4.29	Coumarin	esculetin	C9H6O4	178.41	177.0185, 149.0235, 139.0386, 133.0285, 121.0283, 107.0127, 105.0335, 93.0335, 89.0385, 81.0333, 77.0384	Lianqiao [39]
11	4.43	Phenolic acid	vanillic acid	C8H8O4	168.15	167.0388, 152.0108, 123.0439, 108.0206	Mahuang [37,38], Lianqiao [39]
12	4.47	Flavonoid	2′, 6′-dihydroxypino banksin (2′,3,5,6′, 7-pentahydroxy flavanone)	C15H12O7	304.24	303.0509, 285.0403, 275.0563, 259.0606, 217.0506, 193.0499, 177.0185, 175.0391, 151.0028, 149.0236, 147.0439, 133.0286, 125.0234, 121.0283, 119.0490, 107.0127, 83.0127, 65.0022	Huangqin [49]
13	4.65	Phenolic acid	caffeic acid	C9H8O4	180.16	179.0342, 136.0473, 135.0442, 133.0289, 117.0335, 107.0492, 93.0334, 89.0385, 65.0387	Jinyinhua [36], Mahuang [37,38], Kuxingren [40], Lianqiao [33,39], Niubangzi [41,42], Qinghao [50]
14	4.86	Caffeoylquinic acid	4-O-caffeoylquinic acid (cryptochlorogenic acid)	C16H18O9	354.311	353.0877, 191.0554, 179.0341, 173.0447, 161.0230, 135.0442, 132.0212, 111.0440, 99.0448, 93.0334, 85.0283, 67.0178	Jinyinhua [36], Niubangzi [41,42], Kuxingren [40],
15	5.82	Alkaloid	caffeine	C8H10N4O2	194.191	195.0874, 138.0661, 123.0430, 83.0609, 69.0455	Niubangzi [42]
16	6.73	Xanthone	neomangiferin	C25H28O16	584.48	583.1304, 565.1211, 493.0981, 463.0881, 421.0778, 343.0475, 331.0457, 313.0351, 301.0353, 285.0407, 271.0248, 259.0246, 229.0139, 215.0345, 187.0394, 171.0443, 109.0284	Zhimu [53,54]
17	6.81	Caffeoylquinic acid	1,3-O-dicaffeoylquinic acid	C25H24O12	516.455	515.1191, 353.0878, 335.0776, 191.0555, 179.0343, 161.0238, 135.0443, 127.0397, 107.0493, 85.0284, 81.0331	Jinyinhua [36], Niubangzi [41,42]
18	7.83	Flavonoid	viscidulin I	C15H10O7	302.24	301.0353, 283.0247, 273.0411, 239.0343, 227.0347, 215.035, 201.0549, 193.0135, 187.0394, 171.0443, 159.0443, 151.0029, 148.0157, 145.0285, 133.0285, 125.0234, 121.0283, 119.0129, 107.0128, 93.0333, 91.0178	Huangqin [44–46],
19	8.05	Xanthone	mangiferin	C19H18O11	422.34	421.0777, 403.0670, 331.0457, 313.0351, 301.0353, 298.0105, 285.0400, 271.0248, 259.0246, 243.0296, 227.0345, 215.0344, 199.0396, 187.0394, 171.0443, 159.0442, 143.0495, 109.0283, 95.0129, 79.0177	Zhimu [53,54]
20	8.39	Flavonoid	vicenin-2	C27H30O15	594.52	593.1510, 503.1222, 473.1085, 395.0803, 383.0769, 365.0660, 353.0663, 337.0723, 325.0716, 297.0768, 283.0607, 203.0341, 161.0236, 135.0444, 117.0336, 93.0335, 79.0178	Mahuang [37,38]
21	8.43	Coumarin	scopoletin	C10H8O4	192.17	191.0344, 176.0107, 148.0157, 138.0315, 123.0080, 120.0207, 104.0257, 92.0255	Mahuang [37,38], Qinghao [50],
22	8.72	Phenolic acid	ferulic acid	C10H10O4	194.19	193.0500, 179.0297, 178.0264, 149.0598, 134.0364, 132.0208, 121.0286, 106.0414	Mahuang [37,38], Huangqin [44–46], Kuxingren [40], Lianqiao [33,39],
23	8.86	Flavonoid	schaftoside (apigenin-6-glucoside-8-arabinoside)	C26H28O14	564.5	563.1395, 473.1084, 443.0972, 413.0854, 395.0784, 383.0769, 353.0663, 337.0716, 325.0717, 311.0563, 297.0768, 283.0610, 267.0664, 239.0714, 203.0342, 177.0183, 161.0235, 135.0442, 117.0335, 93.0334, 79.0177	Huangqin [44–46],
24	9.11	Saponin	liquiritin	C21H22O9	418.4	255.0660, 211.0394, 183.0451, 153.0185, 135.0078, 119.0492, 108.0204, 93.0334, 91.0178, 89.0232, 65.0021	Gancao [62–64]
25	9.19	Flavonoid	vitexin	C21H20O10	432	431.0985, 341.0663, 323.0568, 311.0560, 293.0464, 283.0612, 268.0374, 239.0713, 211.0393, 161.0240, 149.0234, 135.0446, 121.0286, 117.0336	Mahuang [37,38], Zhimu [53,54]
26	9.2	Flavonoid	isoschaftoside (apigenin-6-arabinoside-8-glucoside)	C26H28O14	564.49	563.1398, 473.1071, 443.0971, 383.0746, 365.0654, 353.0656, 337.0714, 325.0715, 297.0769, 283.0605, 251.0714, 225.0562, 203.0346, 161.0237, 135.0444, 117.0333, 117.0186, 93.0334, 79.0175	Huangqin [44–46],
27	9.23	Phenylpropanoid	forsythoside B	C34H44O19	756.7	755.2389, 623.1978, 593.2012, 179.0348, 161.0236, 133.0286, 89.0236	Lianqiao [39]
28	9.34	Phenylpropanoid	acteoside (verbascoside) *	C29H36O15	624.59	623.1979, 461.1674, 179.0340, 161.0236, 133.0285	Lianqiao [33,39], Huangqin [44–46]
29	9.43	Anthraquinone	rhein	C15H8O6		284.0327, 255.0299, 240.0430, 227.0349, 211.0399, 183.0444, 155.0494, 141.0334, 132.0210, 117.0338, 82.0045, 65.0020	Mahuang [37,38]
30	9.47	Coumarin	scoparone	C11H10O4	206.19	207.0652, 191.0338, 189.0910, 179.0701, 174.0309, 174.0309, 163.0389, 161.0599, 151.0754, 146.0362, 139.0753, 135.0441, 109.0650, 107.0495, 95.0496, 91.0548, 90.0470, 78.0471, 65.0394
31	9.5	Flavonoid	rutin	C27H30O16	610.52	609.1456, 300.0273, 283.0254, 271.0248, 255.0297, 243.0296, 227.0346, 199.0395, 171.0443, 151.0027, 143.0492, 108.0206, 65.0021	Jinyinhua [36], Mahuang [37,38], Qinghao [50], Huangqin [44–46], Lianqiao [33,39],
32	9.52	Flavonoid	luteoloside (cynaroside)	C21H20O11	448.38	447.0934, 284.0327, 255.0294, 227.0348, 199.0394, 183.0443, 151.0029, 133.0285, 121.0283, 107.0128, 83.0127, 63.0229	Huangqin [68]
33	9.52	Flavonoid	isoquercitrin	C21H20O12	464.38	463.0879, 300.0275, 283.0255, 271.0248, 255.0297, 243.0296, 227.0346, 199.0395, 151.0027, 108.0205, 65.0022	Jinyinhua [36]
34	9.53	Flavonoid	isoviolanthin	C27H30O14	578.52	577.1559, 503.1109, 457.1143, 413.0853, 383.0771, 353.0663, 325.0713, 297.0767, 267.0661, 203.0345, 177.0184, 161.0235, 135.0441, 117.0336, 109.0282, 93.0334, 79.0178
35	9.59	Caffeoylquinic acid	3,4-O-dicaffeoylquinic acid	C25H24O12	516.455	515.1182, 353.0878, 335.0783, 191.0555, 173.0448, 161.0236, 135.0443, 127.0392, 111.0440, 93.0335, 85.0284, 67.0178	Jinyinhua [36], Lianqiao [33,39], Niubangzi [41,42]
36	9.72	Flavonoid	scutellarin	C21H18O12	462.37	463.0861, 287.0547, 269.0435, 241.0481, 169.0131, 119.0493, 95.0133, 85.0290	Huangqin [44–46]
37	9.73	Phenolic acid	R-rosmarinic acid	C18H16O8	360.31	197.0450, 179.0343, 161.0236, 135.0442, 133.0286, 123.0442, 115.0179
38	9.79	Flavonoid	dalbergioidin	C15H12O6	288.65	177.0182, 165.0191, 161.0235, 159.0448, 135.0442, 125.0234, 83.0126
39	9.84	Caffeoylquinic acid	4,5-O-dicaffeoylquinic acid (isochlorogenic acid C)	C25H24O12	516.45	353.0876, 203.0345, 191.0554, 179.0342, 173.0447, 161.0238, 135.0442, 127.0391, 111.0442, 93.0335, 85.0283, 67.0178	Jinyinhua [36], Lianqiao [33,39], Niubangzi [41,42]
40	9.92	Alkaloid	peimisine (ebeiensine) *	C27H41NO3	427.629	410.3040, 393.2769, 337.2153, 303.1956, 213.1639, 197.1322, 142.0777, 119.0857, 114.0917, 84.0814, 67.0550	Zhebeimu [72]
41	9.93	Flavonoid	cosmosiin (apigenin 7-O-glucoside)	C21H20O10	432.4	268.0378, 239.0345, 223.1337, 211.0397, 195.0446, 183.0444, 151.0029, 117.0335, 83.0128, 63.0229	Huangqin [44–46],
42	9.94	Flavonoid	sophoricoside	C21H20O10	432.381	268.0379, 239.0348, 223.0399, 211.0397, 195.0447, 183.0446, 63.0229
43	10.04	Flavonoid	diosmin	C28H32O15	608.54	299.0561, 284.0327, 255.0297, 227.0346, 151.0028, 133.0285, 107.0128
44	10.06	Flavonoid	astragalin	C21H20O11	448.38	284.0327, 255.0298, 239.0347, 227.0346, 211.0395, 199.0397, 183.0444, 171.0446, 167.0493, 155.0495, 139.0545, 65.0019	Jinyinhua [36], Huangqin [44–46], Lianqiao [33,39]
45	10.09	Flavonoid	isorhamnetin-3-O-β-D-glucoside	C22H22O12	478.41	314.0433, 285.0404, 271.0251, 257.0453, 243.0296, 215.0346, 199.0397, 171.0445, 143.0493, 109.0286, 65.0019	Qinghao [50]
46	10.26	Ester	methyl benzoate	C8H8O2	136.148	122.0364, 107.0495, 95.0498, 94.0418, 91.0548, 81.0704, 77.0393, 66.0472
47	10.46	Flavonoid	scutellarein	C15H10O6	286.239	267.0299, 257.0458, 239.0351, 211.0390, 195.0441, 185.0598, 139.0028, 137.0232, 119.0490, 117.0336, 111.0078, 65.0021	Huangqin [44–46],
48	10.5	Flavonoid	oroxin A (baicalein 7-O-glucoside)	C21H20O10	432.38	269.0456, 241.0504, 223.0396, 136.9871, 111.0077, 65.0021	Huangqin [44–46]
49	10.56	Flavonoid	daidzein	C15H10O4	254.24	223.0396, 208.0524, 195.0442, 180.0574, 135.0077, 132.0207, 117.0337
50	10.57	Lignin	(−)-epipinoresinol	C20H22O6	358.39	342.1107, 313.1458, 221.081524, 209.0816, 161.0600, 147.0443, 137.0599, 122.0364, 11539.0493, 93.0335, 83.0127	Lianqiao [33,39]
51	10.58	Flavonoid	luteolin 7-O-glucuronide	C21H18O12	462.36	380.2826, 285.0405, 241.540502, 199.0397, 133.0284, 65.0022	Jinyinhua [36], Mahuang [37,38]
52	10.67	Lignin	(+)-epipinoresinol	C20H22O6	358.39	342.1105, 221.0815, 161.0595, 55147.0444, 122.0364, 93.0335, 83.0127	Lianqiao [33,39]
53	10.69	Flavonoid	quercetin	C15H10O7	302.23	245.0448, 211.0403, 178.9980, 164.0104, 151.0028, 149.0232, 139.0393, 121.0286, 117.0335, 109.0285, 107.0127, 93.0334, 83.0127, 65.0021, 63.0228	Jinyinhua [36], Mahuang [37,38], Huangqin [44–46], Kuxingren [40], Lianqiao [33,39], Zhebeimu [72], Niubangzi [41,42], Qinghao [50],
54	10.72	Phenolic ester	ethyl caffeate	C11H12O4	208.12	179.0342, 161.0237, 137.0238, 135.0442, 133.0286, 115.0179, 105.0336
55	10.78	Flavonoid	calycosin	C16H12O5	284.27	268.0378, 251.0350, 239.0345, 211.0397, 195.0448, 183.0444, 167.0495, 155.0494, 148.0155, 135.0079, 119.0127, 91.0177, 65.0020
56	10.93	Flavonoid	S-naringenin	C15H12O5	272.25	187.0391, 177.0188, 165.0185, 151.0028, 119.0492, 117.0336, 107.0128, 93.0334, 83.0126, 65.0021, 63.0228	Mahuang [37,38]
57	11.52	Flavonoid	irigenin	C18H16O8	360.31	344.0535, 329.0302, 314.0068, 311.0193, 301.0354, 286.0118, 270.0168, 258.0168, 230.0216, 202.0266, 185.0237, 174.0313, 65.0021
58	11.54	Chalcone	isoliquiritigenin	C15H12O4	256.257	169.0646, 153.0185, 135.0078, 119.0493, 117.0338, 93.0335, 91.0178	Gancao [63,64,81]
59	11.58	Alkaloid	solancarpidine	C27H43NO2	413.62	396.3246, 253.1938, 105.0702, 91.0548, 79.0549, 67.0550
60	11.77	Flavonoid	baicalein*	C15H10O5	270.24	251.0349, 241.0504, 225.0548, 223.0397, 213.0556, 185.0601, 169.0650, 151.0543, 141.0703, 136.9871, 123.0078, 111.0078, 101.0387, 95.0126	Huangqin [13]
61	11.84	Flavonoid	formononetin	C16H12O4	268.26	252.0426, 223.0395, 208.0530, 195.0446, 180.0577, 167.0493, 153.0188, 135.0078, 132.0207, 116.0261, 104.0257, 91.0178
62	12.37	Flavonoid	wogonin	C16H12O5	284.26	268.0379, 239.0340, 224.0481, 211.0393, 198.0314, 184.0525, 165.9898, 163.0028, 143.0492, 139.0545, 109.9999, 95.0127, 82.0048, 65.0021	Huangqin [44–46], Lianqiao [33,39],
63	12.48	Flavonoid	chrysin	C15H10O4	254.24	225.0542, 209.0602, 197.0598, 187.0393, 181.0649, 151.0027, 143.0493, 139.0541, 121.0282, 119.0492, 101.0384, 89.0021, 63.0228	Jinyinhua [36], Huangqin [44–46],
64	12.55	Flavonoid	pectolinarigenin	C17H14O6	314.29	298.0484, 283.0247, 269.0444, 255.2970, 239.0348, 227.0349, 211.0394, 185.0235, 164.9821, 136.9870, 117.0336, 65.0015	Jinyinhua [36],
65	13.1	Saponin	licoricesaponin H2 *	C42H62O16	822.9	193.0349, 113.0234, 85.0283	Gancao [62]
66	13.23	Flavonoid	6-prenylapigenin	C20H18O5	338.363	321.0769, 293.0461, 281.0455, 253.0505, 237.0557, 209.0605, 133.0285, 117.0337, 65.0018
67	13.78	Anthraquinone	emodin	C15H10O5	270.24	241.0503, 227.0350, 225.0553, 223.0393, 210.0319, 195.0446, 182.0367, 171.0444, 157.0650, 115.0543, 105.0336, 92.1612
68	13.78	Phenanthra quinone	cryptotanshinone	C19H20O3	296.4	268.1107, 249.0916, 235.0760, 221.0952, 207.0811, 193.1016, 183.0801, 178.0778, 165.0699, 153.0699, 141.0698, 128.0621, 115.0544, 91.0545	Danshen (confidential addition) [13]
69	13.86	Steroid	diosgenin	C27H42O3	414.6	283.2414, 271.2053, 253.1948, 211.1481, 197.1326, 171.1167, 119.0858, 105.0702, 91.0548, 79.0549, 69.0706
70	14.26	Phenanthra quinone	tanshinone IIA*	C19H18O3	294.3	280.1089, 277.2162, 262.0979, 249.1270, 234.1039, 219.0802, 195.0795, 191.0855, 189.0703, 178.0776, 165.0696, 152.0617	Danshen (confidential addition) [13]
71	14.57	Saponin	18β-glycyrrhetinic acid	C30H46O4	470.68	425.3437, 355.2644
72	15.63	Phytophenol	6-gingerol	C17H26O4	294.39	277.1618, 179.0527, 167.0525, 165.0368, 151.0754, 137.042, 135.0804, 133.0648, 107.0861, 105.0702, 103.0546, 95.0496, 91.0548, 87.0269	Ganjiang (confidential addition ?) [13]
73	16.25	Steroid	chloesteryl acetate	C29H48O2	428.69	401.3393, 303.2321, 233.1535, 205.1221, 177.0907, 165.0909, 161.0596, 149.0961, 122.0727, 105.0702, 91.0546, 67.0550
