# Supplementary material for: Network-based pharmacology and UHPLC-Q-Exactive-Orbitrap-MS reveal Jinhua Qinggan granule's mechanism in reducing cellular inflammation in COVID-19
Source: Front Immunol. 2024 Jul 4;15:1382524. doi: 10.3389/fimmu.2024.1382524 (PMC11254672; doi:10.3389/fimmu.2024.1382524)
Supplement: Supplementary file 2 [file Table_2.xlsx]

## Sheet: Sheet1
	herb_id	herb_name	herb_type	target	Resource
0	HBIN041751	quinic acid	Aliphatic acid	CA2	Lianqiao
1	HBIN041751	quinic acid	Aliphatic acid	PTGS2	Lianqiao
2	HBIN041751	quinic acid	Aliphatic acid	GRIA2	Lianqiao
3	HBIN041751	quinic acid	Aliphatic acid	ACHE	Lianqiao
4	HBIN041751	quinic acid	Aliphatic acid	DPP4	Lianqiao
5	HBIN022650	danshensu	Phenolic acid ester	ADRA2C	Danshen
6	HBIN022650	danshensu	Phenolic acid ester	COL3A1	Danshen
7	HBIN022650	danshensu	Phenolic acid ester	ADRB1	Danshen
8	HBIN022650	danshensu	Phenolic acid ester	TIMP1	Danshen
9	HBIN022650	danshensu	Phenolic acid ester	PTGS1	Danshen
10	HBIN022650	danshensu	Phenolic acid ester	TGFB1	Danshen
11	HBIN022650	danshensu	Phenolic acid ester	ADRB2	Danshen
12	HBIN022650	danshensu	Phenolic acid ester	DPEP1	Danshen
13	HBIN022650	danshensu	Phenolic acid ester	ADRA1D	Danshen
14	HBIN022650	danshensu	Phenolic acid ester	NF1	Danshen
15	HBIN022650	danshensu	Phenolic acid ester	COL1A1	Danshen
16	HBIN022650	danshensu	Phenolic acid ester	ACTB	Danshen
17	HBIN022650	danshensu	Phenolic acid ester	PLAU	Danshen
18	HBIN022650	danshensu	Phenolic acid ester	NOS2	Danshen
19	HBIN022650	danshensu	Phenolic acid ester	CDK2	Danshen
20	HBIN022650	danshensu	Phenolic acid ester	RELA	Danshen
21	HBIN022650	danshensu	Phenolic acid ester	ADRA2A	Danshen
22	HBIN022650	danshensu	Phenolic acid ester	CA2	Danshen
23	HBIN022650	danshensu	Phenolic acid ester	LTA4H	Danshen
24	HBIN022650	danshensu	Phenolic acid ester	CTRB1	Danshen
25	HBIN022650	danshensu	Phenolic acid ester	NPPA	Danshen
26	HBIN022650	danshensu	Phenolic acid ester	PRSS1	Danshen
27	HBIN022650	danshensu	Phenolic acid ester	ACHE	Danshen
28	HBIN022650	danshensu	Phenolic acid ester	ADRA2B	Danshen
29	HBIN022650	danshensu	Phenolic acid ester	SOD1	Danshen
30	HBIN022650	danshensu	Phenolic acid ester	HMOX1	Danshen
31	HBIN022650	danshensu	Phenolic acid ester	MAOB	Danshen
32	HBIN022650	danshensu	Phenolic acid ester	PTGS2	Danshen
33	HBIN022650	danshensu	Phenolic acid ester	DPP4	Danshen
34	HBIN044342	sophocarpine	Alkaloid	AKT1	Mixed
35	HBIN044342	sophocarpine	Alkaloid	CTNNB1	Mixed
36	HBIN044342	sophocarpine	Alkaloid	IL6	Mixed
37	HBIN044342	sophocarpine	Alkaloid	ITK	Mixed
38	HBIN044342	sophocarpine	Alkaloid	GSK3B	Mixed
39	HBIN044342	sophocarpine	Alkaloid	TGFB1	Mixed
40	HBIN044342	sophocarpine	Alkaloid	TNF	Mixed
41	HBIN044342	sophocarpine	Alkaloid	MAPK14	Mixed
42	HBIN044342	sophocarpine	Alkaloid	NFKB1	Mixed
43	HBIN044342	sophocarpine	Alkaloid	MIR21	Mixed
44	HBIN044342	sophocarpine	Alkaloid	PTEN	Mixed
45	HBIN040908	protocatechuic acid	Phenolic acid	NFKB1	Mahuang
46	HBIN040908	protocatechuic acid	Phenolic acid	PTGS1	Mahuang
47	HBIN040908	protocatechuic acid	Phenolic acid	IL1B	Mahuang
48	HBIN040908	protocatechuic acid	Phenolic acid	DPEP1	Mahuang
49	HBIN040908	protocatechuic acid	Phenolic acid	CASP9	Mahuang
50	HBIN040908	protocatechuic acid	Phenolic acid	AKT1	Mahuang
51	HBIN040908	protocatechuic acid	Phenolic acid	PRKCZ	Mahuang
52	HBIN040908	protocatechuic acid	Phenolic acid	NFE2L2	Mahuang
53	HBIN040908	protocatechuic acid	Phenolic acid	ALOX5	Mahuang
54	HBIN040908	protocatechuic acid	Phenolic acid	MGAM	Mahuang
55	HBIN040908	protocatechuic acid	Phenolic acid	CDK2	Mahuang
56	HBIN040908	protocatechuic acid	Phenolic acid	PRKCB	Mahuang
57	HBIN040908	protocatechuic acid	Phenolic acid	PRKCA	Mahuang
58	HBIN040908	protocatechuic acid	Phenolic acid	CA2	Mahuang
59	HBIN040908	protocatechuic acid	Phenolic acid	BAX	Mahuang
60	HBIN040908	protocatechuic acid	Phenolic acid	PRSS3	Mahuang
61	HBIN040908	protocatechuic acid	Phenolic acid	CASP3	Mahuang
62	HBIN040908	protocatechuic acid	Phenolic acid	PRSS1	Mahuang
63	HBIN040908	protocatechuic acid	Phenolic acid	MTOR	Mahuang
64	HBIN040908	protocatechuic acid	Phenolic acid	LYZ	Mahuang
65	HBIN040908	protocatechuic acid	Phenolic acid	ACHE	Mahuang
66	HBIN040908	protocatechuic acid	Phenolic acid	PARK7	Mahuang
67	HBIN040908	protocatechuic acid	Phenolic acid	MAOB	Mahuang
68	HBIN040908	protocatechuic acid	Phenolic acid	RAS	Mahuang
69	HBIN040908	protocatechuic acid	Phenolic acid	PTGS2	Mahuang
70	HBIN040908	protocatechuic acid	Phenolic acid	CASP8	Mahuang
71	HBIN040908	protocatechuic acid	Phenolic acid	MMP2	Mahuang
72	HBIN040908	protocatechuic acid	Phenolic acid	IL10	Mahuang
73	HBIN040908	protocatechuic acid	Phenolic acid	PRKCG	Mahuang
74	HBIN040908	protocatechuic acid	Phenolic acid	RHOB	Mahuang
75	HBIN040908	protocatechuic acid	Phenolic acid	BCL2	Mahuang
76	HBIN040908	protocatechuic acid	Phenolic acid	NFKB1	Jinyinhua
77	HBIN040908	protocatechuic acid	Phenolic acid	PTGS1	Jinyinhua
78	HBIN040908	protocatechuic acid	Phenolic acid	IL1B	Jinyinhua
79	HBIN040908	protocatechuic acid	Phenolic acid	DPEP1	Jinyinhua
80	HBIN040908	protocatechuic acid	Phenolic acid	CASP9	Jinyinhua
81	HBIN040908	protocatechuic acid	Phenolic acid	AKT1	Jinyinhua
82	HBIN040908	protocatechuic acid	Phenolic acid	PRKCZ	Jinyinhua
83	HBIN040908	protocatechuic acid	Phenolic acid	NFE2L2	Jinyinhua
84	HBIN040908	protocatechuic acid	Phenolic acid	ALOX5	Jinyinhua
85	HBIN040908	protocatechuic acid	Phenolic acid	MGAM	Jinyinhua
86	HBIN040908	protocatechuic acid	Phenolic acid	CDK2	Jinyinhua
87	HBIN040908	protocatechuic acid	Phenolic acid	PRKCB	Jinyinhua
88	HBIN040908	protocatechuic acid	Phenolic acid	PRKCA	Jinyinhua
89	HBIN040908	protocatechuic acid	Phenolic acid	CA2	Jinyinhua
90	HBIN040908	protocatechuic acid	Phenolic acid	BAX	Jinyinhua
91	HBIN040908	protocatechuic acid	Phenolic acid	PRSS3	Jinyinhua
92	HBIN040908	protocatechuic acid	Phenolic acid	CASP3	Jinyinhua
93	HBIN040908	protocatechuic acid	Phenolic acid	PRSS1	Jinyinhua
94	HBIN040908	protocatechuic acid	Phenolic acid	MTOR	Jinyinhua
95	HBIN040908	protocatechuic acid	Phenolic acid	LYZ	Jinyinhua
96	HBIN040908	protocatechuic acid	Phenolic acid	ACHE	Jinyinhua
97	HBIN040908	protocatechuic acid	Phenolic acid	PARK7	Jinyinhua
98	HBIN040908	protocatechuic acid	Phenolic acid	MAOB	Jinyinhua
99	HBIN040908	protocatechuic acid	Phenolic acid	RAS	Jinyinhua
100	HBIN040908	protocatechuic acid	Phenolic acid	PTGS2	Jinyinhua
101	HBIN040908	protocatechuic acid	Phenolic acid	CASP8	Jinyinhua
102	HBIN040908	protocatechuic acid	Phenolic acid	MMP2	Jinyinhua
103	HBIN040908	protocatechuic acid	Phenolic acid	IL10	Jinyinhua
104	HBIN040908	protocatechuic acid	Phenolic acid	PRKCG	Jinyinhua
105	HBIN040908	protocatechuic acid	Phenolic acid	RHOB	Jinyinhua
106	HBIN040908	protocatechuic acid	Phenolic acid	BCL2	Jinyinhua
107	HBIN040908	protocatechuic acid	Phenolic acid	NFKB1	Lianqiao
108	HBIN040908	protocatechuic acid	Phenolic acid	PTGS1	Lianqiao
109	HBIN040908	protocatechuic acid	Phenolic acid	IL1B	Lianqiao
110	HBIN040908	protocatechuic acid	Phenolic acid	DPEP1	Lianqiao
111	HBIN040908	protocatechuic acid	Phenolic acid	CASP9	Lianqiao
112	HBIN040908	protocatechuic acid	Phenolic acid	AKT1	Lianqiao
113	HBIN040908	protocatechuic acid	Phenolic acid	PRKCZ	Lianqiao
114	HBIN040908	protocatechuic acid	Phenolic acid	NFE2L2	Lianqiao
115	HBIN040908	protocatechuic acid	Phenolic acid	ALOX5	Lianqiao
116	HBIN040908	protocatechuic acid	Phenolic acid	MGAM	Lianqiao
117	HBIN040908	protocatechuic acid	Phenolic acid	CDK2	Lianqiao
118	HBIN040908	protocatechuic acid	Phenolic acid	PRKCB	Lianqiao
119	HBIN040908	protocatechuic acid	Phenolic acid	PRKCA	Lianqiao
120	HBIN040908	protocatechuic acid	Phenolic acid	CA2	Lianqiao
121	HBIN040908	protocatechuic acid	Phenolic acid	BAX	Lianqiao
122	HBIN040908	protocatechuic acid	Phenolic acid	PRSS3	Lianqiao
123	HBIN040908	protocatechuic acid	Phenolic acid	CASP3	Lianqiao
124	HBIN040908	protocatechuic acid	Phenolic acid	PRSS1	Lianqiao
125	HBIN040908	protocatechuic acid	Phenolic acid	MTOR	Lianqiao
126	HBIN040908	protocatechuic acid	Phenolic acid	LYZ	Lianqiao
127	HBIN040908	protocatechuic acid	Phenolic acid	ACHE	Lianqiao
128	HBIN040908	protocatechuic acid	Phenolic acid	PARK7	Lianqiao
129	HBIN040908	protocatechuic acid	Phenolic acid	MAOB	Lianqiao
130	HBIN040908	protocatechuic acid	Phenolic acid	RAS	Lianqiao
131	HBIN040908	protocatechuic acid	Phenolic acid	PTGS2	Lianqiao
132	HBIN040908	protocatechuic acid	Phenolic acid	CASP8	Lianqiao
133	HBIN040908	protocatechuic acid	Phenolic acid	MMP2	Lianqiao
134	HBIN040908	protocatechuic acid	Phenolic acid	IL10	Lianqiao
135	HBIN040908	protocatechuic acid	Phenolic acid	PRKCG	Lianqiao
136	HBIN040908	protocatechuic acid	Phenolic acid	RHOB	Lianqiao
137	HBIN040908	protocatechuic acid	Phenolic acid	BCL2	Lianqiao
138	HBIN036584	neochlorogenic acid	Caffeoylquinic acid	CA2	Jinyinhua
139	HBIN036584	neochlorogenic acid	Caffeoylquinic acid	ESR1	Jinyinhua
140	HBIN036584	neochlorogenic acid	Caffeoylquinic acid	GSK3B	Jinyinhua
141	HBIN036584	neochlorogenic acid	Caffeoylquinic acid	AR	Jinyinhua
142	HBIN036584	neochlorogenic acid	Caffeoylquinic acid	PTGS2	Jinyinhua
143	HBIN036584	neochlorogenic acid	Caffeoylquinic acid	NOS2	Jinyinhua
144	HBIN036584	neochlorogenic acid	Caffeoylquinic acid	PRSS1	Jinyinhua
145	HBIN036584	neochlorogenic acid	Caffeoylquinic acid	DPEP1	Jinyinhua
146	HBIN036584	neochlorogenic acid	Caffeoylquinic acid	CDK2	Jinyinhua
147	HBIN036584	neochlorogenic acid	Caffeoylquinic acid	DPP4	Jinyinhua
148	HBIN036584	neochlorogenic acid	Caffeoylquinic acid	CA2	Niubangzi
149	HBIN036584	neochlorogenic acid	Caffeoylquinic acid	ESR1	Niubangzi
150	HBIN036584	neochlorogenic acid	Caffeoylquinic acid	GSK3B	Niubangzi
151	HBIN036584	neochlorogenic acid	Caffeoylquinic acid	AR	Niubangzi
152	HBIN036584	neochlorogenic acid	Caffeoylquinic acid	PTGS2	Niubangzi
153	HBIN036584	neochlorogenic acid	Caffeoylquinic acid	NOS2	Niubangzi
154	HBIN036584	neochlorogenic acid	Caffeoylquinic acid	PRSS1	Niubangzi
155	HBIN036584	neochlorogenic acid	Caffeoylquinic acid	DPEP1	Niubangzi
156	HBIN036584	neochlorogenic acid	Caffeoylquinic acid	CDK2	Niubangzi
157	HBIN036584	neochlorogenic acid	Caffeoylquinic acid	DPP4	Niubangzi
158	HBIN036584	neochlorogenic acid	Caffeoylquinic acid	CA2	Kuxingren
159	HBIN036584	neochlorogenic acid	Caffeoylquinic acid	ESR1	Kuxingren
160	HBIN036584	neochlorogenic acid	Caffeoylquinic acid	GSK3B	Kuxingren
161	HBIN036584	neochlorogenic acid	Caffeoylquinic acid	AR	Kuxingren
162	HBIN036584	neochlorogenic acid	Caffeoylquinic acid	PTGS2	Kuxingren
163	HBIN036584	neochlorogenic acid	Caffeoylquinic acid	NOS2	Kuxingren
164	HBIN036584	neochlorogenic acid	Caffeoylquinic acid	PRSS1	Kuxingren
165	HBIN036584	neochlorogenic acid	Caffeoylquinic acid	DPEP1	Kuxingren
166	HBIN036584	neochlorogenic acid	Caffeoylquinic acid	CDK2	Kuxingren
167	HBIN036584	neochlorogenic acid	Caffeoylquinic acid	DPP4	Kuxingren
168	HBIN033621	l-tryptophan	Amino acid	KYAT3	Mahuang
169	HBIN033621	l-tryptophan	Amino acid	PRSS27	Mahuang
170	HBIN033621	l-tryptophan	Amino acid	TRHDE	Mahuang
171	HBIN033621	l-tryptophan	Amino acid	TMPRSS3	Mahuang
172	HBIN033621	l-tryptophan	Amino acid	PAH	Mahuang
173	HBIN033621	l-tryptophan	Amino acid	RPS5	Mahuang
174	HBIN033621	l-tryptophan	Amino acid	CPQ	Mahuang
175	HBIN033621	l-tryptophan	Amino acid	GGCT	Mahuang
176	HBIN033621	l-tryptophan	Amino acid	MASP1	Mahuang
177	HBIN033621	l-tryptophan	Amino acid	PSMD13	Mahuang
178	HBIN033621	l-tryptophan	Amino acid	IMP3	Mahuang
179	HBIN033621	l-tryptophan	Amino acid	PSMA8	Mahuang
180	HBIN033621	l-tryptophan	Amino acid	PSMB5	Mahuang
181	HBIN033621	l-tryptophan	Amino acid	PSMD5	Mahuang
182	HBIN033621	l-tryptophan	Amino acid	RPS14	Mahuang
183	HBIN033621	l-tryptophan	Amino acid	RNPEPL1	Mahuang
184	HBIN033621	l-tryptophan	Amino acid	CORIN	Mahuang
185	HBIN033621	l-tryptophan	Amino acid	ACCSL	Mahuang
186	HBIN033621	l-tryptophan	Amino acid	PRSS33	Mahuang
187	HBIN033621	l-tryptophan	Amino acid	RPS20	Mahuang
188	HBIN033621	l-tryptophan	Amino acid	PSMD11	Mahuang
189	HBIN033621	l-tryptophan	Amino acid	IDO2	Mahuang
190	HBIN033621	l-tryptophan	Amino acid	CTRL	Mahuang
191	HBIN033621	l-tryptophan	Amino acid	RPS15	Mahuang
192	HBIN033621	l-tryptophan	Amino acid	RPS3	Mahuang
193	HBIN033621	l-tryptophan	Amino acid	CHRM4	Mahuang
194	HBIN033621	l-tryptophan	Amino acid	PSMB4	Mahuang
195	HBIN033621	l-tryptophan	Amino acid	TPP2	Mahuang
196	HBIN033621	l-tryptophan	Amino acid	C1S	Mahuang
197	HBIN033621	l-tryptophan	Amino acid	PSME3	Mahuang
198	HBIN033621	l-tryptophan	Amino acid	TPSD1	Mahuang
199	HBIN033621	l-tryptophan	Amino acid	ERMP1	Mahuang
200	HBIN033621	l-tryptophan	Amino acid	SLC6A17	Mahuang
201	HBIN033621	l-tryptophan	Amino acid	SLC6A1	Mahuang
202	HBIN033621	l-tryptophan	Amino acid	TMPRSS11F	Mahuang
203	HBIN033621	l-tryptophan	Amino acid	PLAU	Mahuang
204	HBIN033621	l-tryptophan	Amino acid	PRSS37	Mahuang
205	HBIN033621	l-tryptophan	Amino acid	HP	Mahuang
206	HBIN033621	l-tryptophan	Amino acid	GZMH	Mahuang
207	HBIN033621	l-tryptophan	Amino acid	TMPRSS11D	Mahuang
208	HBIN033621	l-tryptophan	Amino acid	ST14	Mahuang
209	HBIN033621	l-tryptophan	Amino acid	GPT2	Mahuang
210	HBIN033621	l-tryptophan	Amino acid	PSMA4	Mahuang
211	HBIN033621	l-tryptophan	Amino acid	NAALAD2	Mahuang
212	HBIN033621	l-tryptophan	Amino acid	HPR	Mahuang
213	HBIN033621	l-tryptophan	Amino acid	ELANE	Mahuang
214	HBIN033621	l-tryptophan	Amino acid	OVCH1	Mahuang
215	HBIN033621	l-tryptophan	Amino acid	HLA-C	Mahuang
216	HBIN033621	l-tryptophan	Amino acid	TMPRSS5	Mahuang
217	HBIN033621	l-tryptophan	Amino acid	LTA4H	Mahuang
218	HBIN033621	l-tryptophan	Amino acid	MRPS7	Mahuang
219	HBIN033621	l-tryptophan	Amino acid	TH	Mahuang
220	HBIN033621	l-tryptophan	Amino acid	SLC6A16	Mahuang
221	HBIN033621	l-tryptophan	Amino acid	CFD	Mahuang
222	HBIN033621	l-tryptophan	Amino acid	PRSS12	Mahuang
223	HBIN033621	l-tryptophan	Amino acid	PRSS1	Mahuang
224	HBIN033621	l-tryptophan	Amino acid	CTRC	Mahuang
225	HBIN033621	l-tryptophan	Amino acid	SLC6A12	Mahuang
226	HBIN033621	l-tryptophan	Amino acid	KLK5	Mahuang
227	HBIN033621	l-tryptophan	Amino acid	PRSS21	Mahuang
228	HBIN033621	l-tryptophan	Amino acid	TAT	Mahuang
229	HBIN033621	l-tryptophan	Amino acid	SLC6A4	Mahuang
230	HBIN033621	l-tryptophan	Amino acid	TPSAB1	Mahuang
231	HBIN033621	l-tryptophan	Amino acid	RPSA	Mahuang
232	HBIN033621	l-tryptophan	Amino acid	TDO2	Mahuang
233	HBIN033621	l-tryptophan	Amino acid	NAALADL1	Mahuang
234	HBIN033621	l-tryptophan	Amino acid	MRPS5	Mahuang
235	HBIN033621	l-tryptophan	Amino acid	SLC6A19	Mahuang
236	HBIN033621	l-tryptophan	Amino acid	HGF	Mahuang
237	HBIN033621	l-tryptophan	Amino acid	PSMA3	Mahuang
238	HBIN033621	l-tryptophan	Amino acid	PSMB1	Mahuang
239	HBIN033621	l-tryptophan	Amino acid	SLC6A8	Mahuang
240	HBIN033621	l-tryptophan	Amino acid	PSMD12	Mahuang
241	HBIN033621	l-tryptophan	Amino acid	NPEPPS	Mahuang
242	HBIN033621	l-tryptophan	Amino acid	GPT	Mahuang
243	HBIN033621	l-tryptophan	Amino acid	PRSS54	Mahuang
244	HBIN033621	l-tryptophan	Amino acid	GZMM	Mahuang
245	HBIN033621	l-tryptophan	Amino acid	PSMC5	Mahuang
246	HBIN033621	l-tryptophan	Amino acid	AGO2	Mahuang
247	HBIN033621	l-tryptophan	Amino acid	F11	Mahuang
248	HBIN033621	l-tryptophan	Amino acid	SLC7A8	Mahuang
249	HBIN033621	l-tryptophan	Amino acid	TPH1	Mahuang
250	HBIN033621	l-tryptophan	Amino acid	CTSS	Mahuang
251	HBIN033621	l-tryptophan	Amino acid	ERAP1	Mahuang
252	HBIN033621	l-tryptophan	Amino acid	CNOT1	Mahuang
253	HBIN033621	l-tryptophan	Amino acid	SLC3A2	Mahuang
254	HBIN033621	l-tryptophan	Amino acid	MRPS15	Mahuang
255	HBIN033621	l-tryptophan	Amino acid	TMPRSS11A	Mahuang
256	HBIN033621	l-tryptophan	Amino acid	KLKB1	Mahuang
257	HBIN033621	l-tryptophan	Amino acid	HLA-B	Mahuang
258	HBIN033621	l-tryptophan	Amino acid	CNOT9	Mahuang
259	HBIN033621	l-tryptophan	Amino acid	CTRB2	Mahuang
260	HBIN033621	l-tryptophan	Amino acid	BLMH	Mahuang
261	HBIN033621	l-tryptophan	Amino acid	PSMD2	Mahuang
262	HBIN033621	l-tryptophan	Amino acid	F10	Mahuang
263	HBIN033621	l-tryptophan	Amino acid	PSMF1	Mahuang
264	HBIN033621	l-tryptophan	Amino acid	DAO	Mahuang
265	HBIN033621	l-tryptophan	Amino acid	MRPS16	Mahuang
266	HBIN033621	l-tryptophan	Amino acid	TMPRSS11B	Mahuang
267	HBIN033621	l-tryptophan	Amino acid	ANPEP	Mahuang
268	HBIN033621	l-tryptophan	Amino acid	PSMC3	Mahuang
269	HBIN033621	l-tryptophan	Amino acid	PRTN3	Mahuang
270	HBIN033621	l-tryptophan	Amino acid	SLC16A10	Mahuang
271	HBIN033621	l-tryptophan	Amino acid	PRSS48	Mahuang
272	HBIN033621	l-tryptophan	Amino acid	PSMD4	Mahuang
273	HBIN033621	l-tryptophan	Amino acid	RPS27A	Mahuang
274	HBIN033621	l-tryptophan	Amino acid	RPS9	Mahuang
275	HBIN033621	l-tryptophan	Amino acid	HLA-A	Mahuang
276	HBIN033621	l-tryptophan	Amino acid	F2	Mahuang
277	HBIN033621	l-tryptophan	Amino acid	WARS1	Mahuang
278	HBIN033621	l-tryptophan	Amino acid	PRSS36	Mahuang
279	HBIN033621	l-tryptophan	Amino acid	PRSS42P	Mahuang
280	HBIN033621	l-tryptophan	Amino acid	TMPRSS12	Mahuang
281	HBIN033621	l-tryptophan	Amino acid	RPS23	Mahuang
282	HBIN033621	l-tryptophan	Amino acid	F7	Mahuang
283	HBIN033621	l-tryptophan	Amino acid	PLAT	Mahuang
284	HBIN033621	l-tryptophan	Amino acid	KLK10	Mahuang
285	HBIN033621	l-tryptophan	Amino acid	MRPS2	Mahuang
286	HBIN033621	l-tryptophan	Amino acid	CTRB1	Mahuang
287	HBIN033621	l-tryptophan	Amino acid	UBB	Mahuang
288	HBIN033621	l-tryptophan	Amino acid	PRSS38	Mahuang
289	HBIN033621	l-tryptophan	Amino acid	THOP1	Mahuang
290	HBIN033621	l-tryptophan	Amino acid	TMPRSS9	Mahuang
291	HBIN033621	l-tryptophan	Amino acid	MST1	Mahuang
292	HBIN033621	l-tryptophan	Amino acid	KLK9	Mahuang
293	HBIN033621	l-tryptophan	Amino acid	F9	Mahuang
294	HBIN033621	l-tryptophan	Amino acid	PROC	Mahuang
295	HBIN033621	l-tryptophan	Amino acid	MASP2	Mahuang
296	HBIN033621	l-tryptophan	Amino acid	MRPS9	Mahuang
297	HBIN033621	l-tryptophan	Amino acid	PSMB10	Mahuang
298	HBIN033621	l-tryptophan	Amino acid	ENPEP	Mahuang
299	HBIN033621	l-tryptophan	Amino acid	KLK6	Mahuang
300	HBIN033621	l-tryptophan	Amino acid	PSMA7	Mahuang
301	HBIN033621	l-tryptophan	Amino acid	PRSS57	Mahuang
302	HBIN033621	l-tryptophan	Amino acid	CFB	Mahuang
303	HBIN033621	l-tryptophan	Amino acid	PSMD7	Mahuang
304	HBIN033621	l-tryptophan	Amino acid	KLK11	Mahuang
305	HBIN033621	l-tryptophan	Amino acid	PSMB2	Mahuang
306	HBIN033621	l-tryptophan	Amino acid	PSMC4	Mahuang
307	HBIN033621	l-tryptophan	Amino acid	TMPRSS11E	Mahuang
308	HBIN033621	l-tryptophan	Amino acid	CELA1	Mahuang
309	HBIN033621	l-tryptophan	Amino acid	GZMK	Mahuang
310	HBIN033621	l-tryptophan	Amino acid	PSME2	Mahuang
311	HBIN033621	l-tryptophan	Amino acid	CELA3A	Mahuang
312	HBIN033621	l-tryptophan	Amino acid	KLK15	Mahuang
313	HBIN033621	l-tryptophan	Amino acid	TMPRSS6	Mahuang
314	HBIN033621	l-tryptophan	Amino acid	TFRC	Mahuang
315	HBIN033621	l-tryptophan	Amino acid	HPN	Mahuang
316	HBIN033621	l-tryptophan	Amino acid	KLK2	Mahuang
317	HBIN033621	l-tryptophan	Amino acid	PRSS40A	Mahuang
318	HBIN033621	l-tryptophan	Amino acid	UBC	Mahuang
319	HBIN033621	l-tryptophan	Amino acid	ERAP2	Mahuang
320	HBIN033621	l-tryptophan	Amino acid	PSME4	Mahuang
321	HBIN033621	l-tryptophan	Amino acid	PROZ	Mahuang
322	HBIN033621	l-tryptophan	Amino acid	KLK8	Mahuang
323	HBIN033621	l-tryptophan	Amino acid	PSMD3	Mahuang
324	HBIN033621	l-tryptophan	Amino acid	IDO1	Mahuang
325	HBIN033621	l-tryptophan	Amino acid	GZMA	Mahuang
326	HBIN033621	l-tryptophan	Amino acid	TMPRSS2	Mahuang
327	HBIN033621	l-tryptophan	Amino acid	TMPRSS7	Mahuang
328	HBIN033621	l-tryptophan	Amino acid	MRPS18C	Mahuang
329	HBIN033621	l-tryptophan	Amino acid	TMPRSS4	Mahuang
330	HBIN033621	l-tryptophan	Amino acid	RPS29	Mahuang
331	HBIN033621	l-tryptophan	Amino acid	PLG	Mahuang
332	HBIN033621	l-tryptophan	Amino acid	PRSS50	Mahuang
333	HBIN033621	l-tryptophan	Amino acid	SLC6A11	Mahuang
334	HBIN033621	l-tryptophan	Amino acid	IL4I1	Mahuang
335	HBIN033621	l-tryptophan	Amino acid	CRH	Mahuang
336	HBIN033621	l-tryptophan	Amino acid	PSMA5	Mahuang
337	HBIN033621	l-tryptophan	Amino acid	MIPEP	Mahuang
338	HBIN033621	l-tryptophan	Amino acid	SLC6A7	Mahuang
339	HBIN033621	l-tryptophan	Amino acid	MRPS18A	Mahuang
340	HBIN033621	l-tryptophan	Amino acid	PSMA6	Mahuang
341	HBIN033621	l-tryptophan	Amino acid	SLC6A3	Mahuang
342	HBIN033621	l-tryptophan	Amino acid	PSMC6	Mahuang
343	HBIN033621	l-tryptophan	Amino acid	RPS15A	Mahuang
344	HBIN033621	l-tryptophan	Amino acid	KLK13	Mahuang
345	HBIN033621	l-tryptophan	Amino acid	SLC6A18	Mahuang
346	HBIN033621	l-tryptophan	Amino acid	WARS2	Mahuang
347	HBIN033621	l-tryptophan	Amino acid	CELA2A	Mahuang
348	HBIN033621	l-tryptophan	Amino acid	SLC6A20	Mahuang
349	HBIN033621	l-tryptophan	Amino acid	CMA1	Mahuang
350	HBIN033621	l-tryptophan	Amino acid	KLK12	Mahuang
351	HBIN033621	l-tryptophan	Amino acid	FOLH1	Mahuang
352	HBIN033621	l-tryptophan	Amino acid	C1RL	Mahuang
353	HBIN033621	l-tryptophan	Amino acid	PSMB7	Mahuang
354	HBIN033621	l-tryptophan	Amino acid	RPS11	Mahuang
355	HBIN033621	l-tryptophan	Amino acid	PSMD6	Mahuang
356	HBIN033621	l-tryptophan	Amino acid	LNPEP	Mahuang
357	HBIN033621	l-tryptophan	Amino acid	PSMB6	Mahuang
358	HBIN033621	l-tryptophan	Amino acid	CELA3B	Mahuang
359	HBIN033621	l-tryptophan	Amino acid	TMPRSS13	Mahuang
360	HBIN033621	l-tryptophan	Amino acid	LPA	Mahuang
361	HBIN033621	l-tryptophan	Amino acid	SLC6A5	Mahuang
362	HBIN033621	l-tryptophan	Amino acid	HABP2	Mahuang
363	HBIN033621	l-tryptophan	Amino acid	KLK1	Mahuang
364	HBIN033621	l-tryptophan	Amino acid	C2	Mahuang
365	HBIN033621	l-tryptophan	Amino acid	HGFAC	Mahuang
366	HBIN033621	l-tryptophan	Amino acid	PSMD9	Mahuang
367	HBIN033621	l-tryptophan	Amino acid	SLC6A2	Mahuang
368	HBIN033621	l-tryptophan	Amino acid	ACR	Mahuang
369	HBIN033621	l-tryptophan	Amino acid	SLC7A5	Mahuang
370	HBIN033621	l-tryptophan	Amino acid	PSMC2	Mahuang
371	HBIN033621	l-tryptophan	Amino acid	PSMD14	Mahuang
372	HBIN033621	l-tryptophan	Amino acid	TPSG1	Mahuang
373	HBIN033621	l-tryptophan	Amino acid	LVRN	Mahuang
374	HBIN033621	l-tryptophan	Amino acid	KLK14	Mahuang
375	HBIN033621	l-tryptophan	Amino acid	PSMD1	Mahuang
376	HBIN033621	l-tryptophan	Amino acid	RPS18	Mahuang
377	HBIN033621	l-tryptophan	Amino acid	GZMB	Mahuang
378	HBIN033621	l-tryptophan	Amino acid	KYAT1	Mahuang
379	HBIN033621	l-tryptophan	Amino acid	CTSG	Mahuang
380	HBIN033621	l-tryptophan	Amino acid	PSMD10	Mahuang
381	HBIN033621	l-tryptophan	Amino acid	B2M	Mahuang
382	HBIN033621	l-tryptophan	Amino acid	AZU1	Mahuang
383	HBIN033621	l-tryptophan	Amino acid	F12	Mahuang
384	HBIN033621	l-tryptophan	Amino acid	CFI	Mahuang
385	HBIN033621	l-tryptophan	Amino acid	PSME1	Mahuang
386	HBIN033621	l-tryptophan	Amino acid	DDC	Mahuang
387	HBIN033621	l-tryptophan	Amino acid	AOPEP	Mahuang
388	HBIN033621	l-tryptophan	Amino acid	PSMD8	Mahuang
389	HBIN033621	l-tryptophan	Amino acid	SLC6A15	Mahuang
390	HBIN033621	l-tryptophan	Amino acid	MBD2	Mahuang
391	HBIN033621	l-tryptophan	Amino acid	MRPS10	Mahuang
392	HBIN033621	l-tryptophan	Amino acid	TFR2	Mahuang
393	HBIN033621	l-tryptophan	Amino acid	RPS2	Mahuang
394	HBIN033621	l-tryptophan	Amino acid	RNPEP	Mahuang
395	HBIN033621	l-tryptophan	Amino acid	PRSS46P	Mahuang
396	HBIN033621	l-tryptophan	Amino acid	RPS16	Mahuang
397	HBIN033621	l-tryptophan	Amino acid	NLN	Mahuang
398	HBIN033621	l-tryptophan	Amino acid	SLC6A13	Mahuang
399	HBIN033621	l-tryptophan	Amino acid	ACCS	Mahuang
400	HBIN033621	l-tryptophan	Amino acid	PRSS3	Mahuang
401	HBIN033621	l-tryptophan	Amino acid	MRPS12	Mahuang
402	HBIN033621	l-tryptophan	Amino acid	MRPS11	Mahuang
403	HBIN033621	l-tryptophan	Amino acid	PRSS22	Mahuang
404	HBIN033621	l-tryptophan	Amino acid	KLK3	Mahuang
405	HBIN033621	l-tryptophan	Amino acid	MRPS6	Mahuang
406	HBIN033621	l-tryptophan	Amino acid	PRSS53	Mahuang
407	HBIN033621	l-tryptophan	Amino acid	PRSS45P	Mahuang
408	HBIN033621	l-tryptophan	Amino acid	UBA52	Mahuang
409	HBIN033621	l-tryptophan	Amino acid	PRUNE1	Mahuang
410	HBIN033621	l-tryptophan	Amino acid	PRSS8	Mahuang
411	HBIN033621	l-tryptophan	Amino acid	KLK4	Mahuang
412	HBIN033621	l-tryptophan	Amino acid	PSMC1	Mahuang
413	HBIN033621	l-tryptophan	Amino acid	KLK7	Mahuang
414	HBIN033621	l-tryptophan	Amino acid	SLC6A9	Mahuang
415	HBIN033621	l-tryptophan	Amino acid	PSMB11	Mahuang
416	HBIN033621	l-tryptophan	Amino acid	TPH2	Mahuang
417	HBIN033621	l-tryptophan	Amino acid	RPS13	Mahuang
418	HBIN033621	l-tryptophan	Amino acid	PRSS58	Mahuang
419	HBIN033621	l-tryptophan	Amino acid	CELA2B	Mahuang
420	HBIN033621	l-tryptophan	Amino acid	PRSS55	Mahuang
421	HBIN033621	l-tryptophan	Amino acid	NAALADL2	Mahuang
422	HBIN033621	l-tryptophan	Amino acid	TMPRSS15	Mahuang
423	HBIN033621	l-tryptophan	Amino acid	PSMA1	Mahuang
424	HBIN033621	l-tryptophan	Amino acid	CHRM1	Mahuang
425	HBIN033621	l-tryptophan	Amino acid	HLA-G	Mahuang
426	HBIN033621	l-tryptophan	Amino acid	MRPS14	Mahuang
427	HBIN042854	salidroside	Glycoside	PRKAA2	Huangqin
428	HBIN042854	salidroside	Glycoside	ESR1	Huangqin
429	HBIN042854	salidroside	Glycoside	NFKB1	Huangqin
430	HBIN042854	salidroside	Glycoside	DDIT3	Huangqin
431	HBIN042854	salidroside	Glycoside	PIK3CA	Huangqin
432	HBIN042854	salidroside	Glycoside	DPEP1	Huangqin
433	HBIN042854	salidroside	Glycoside	CASP9	Huangqin
434	HBIN042854	salidroside	Glycoside	PIK3CG	Huangqin
435	HBIN042854	salidroside	Glycoside	MET	Huangqin
436	HBIN042854	salidroside	Glycoside	AKT1	Huangqin
437	HBIN042854	salidroside	Glycoside	IL6	Huangqin
438	HBIN042854	salidroside	Glycoside	SIRT1	Huangqin
439	HBIN042854	salidroside	Glycoside	MAPK3	Huangqin
440	HBIN042854	salidroside	Glycoside	KAT2B	Huangqin
441	HBIN042854	salidroside	Glycoside	MAPK1	Huangqin
442	HBIN042854	salidroside	Glycoside	PIK3CD	Huangqin
443	HBIN042854	salidroside	Glycoside	NOS2	Huangqin
444	HBIN042854	salidroside	Glycoside	CDK2	Huangqin
445	HBIN042854	salidroside	Glycoside	RELA	Huangqin
446	HBIN042854	salidroside	Glycoside	CA2	Huangqin
447	HBIN042854	salidroside	Glycoside	FGF2	Huangqin
448	HBIN042854	salidroside	Glycoside	GSK3B	Huangqin
449	HBIN042854	salidroside	Glycoside	MYHC	Huangqin
450	HBIN042854	salidroside	Glycoside	BAX	Huangqin
451	HBIN042854	salidroside	Glycoside	PIK3CB	Huangqin
452	HBIN042854	salidroside	Glycoside	CYCS	Huangqin
453	HBIN042854	salidroside	Glycoside	BCL2L1	Huangqin
454	HBIN042854	salidroside	Glycoside	MTOR	Huangqin
455	HBIN042854	salidroside	Glycoside	ADORA2A	Huangqin
456	HBIN042854	salidroside	Glycoside	PGAM5	Huangqin
457	HBIN042854	salidroside	Glycoside	HIF1A	Huangqin
458	HBIN042854	salidroside	Glycoside	HMOX1	Huangqin
459	HBIN042854	salidroside	Glycoside	MMP9	Huangqin
460	HBIN042854	salidroside	Glycoside	MAPT	Huangqin
461	HBIN042854	salidroside	Glycoside	PARP1	Huangqin
462	HBIN042854	salidroside	Glycoside	PRKAB1	Huangqin
463	HBIN042854	salidroside	Glycoside	PCK1	Huangqin
464	HBIN042854	salidroside	Glycoside	TNF	Huangqin
465	HBIN042854	salidroside	Glycoside	VEGFA	Huangqin
466	HBIN042854	salidroside	Glycoside	DPP4	Huangqin
467	HBIN042854	salidroside	Glycoside	G6PC	Huangqin
468	HBIN042854	salidroside	Glycoside	PTGS2	Huangqin
469	HBIN042854	salidroside	Glycoside	HGF	Huangqin
470	HBIN042854	salidroside	Glycoside	MMP2	Huangqin
471	HBIN042854	salidroside	Glycoside	PRKAA1	Huangqin
472	HBIN042854	salidroside	Glycoside	BCL2	Huangqin
473	HBIN042854	salidroside	Glycoside	PRKAA2	Lianqiao
474	HBIN042854	salidroside	Glycoside	ESR1	Lianqiao
475	HBIN042854	salidroside	Glycoside	NFKB1	Lianqiao
476	HBIN042854	salidroside	Glycoside	DDIT3	Lianqiao
477	HBIN042854	salidroside	Glycoside	PIK3CA	Lianqiao
478	HBIN042854	salidroside	Glycoside	DPEP1	Lianqiao
479	HBIN042854	salidroside	Glycoside	CASP9	Lianqiao
480	HBIN042854	salidroside	Glycoside	PIK3CG	Lianqiao
481	HBIN042854	salidroside	Glycoside	MET	Lianqiao
482	HBIN042854	salidroside	Glycoside	AKT1	Lianqiao
483	HBIN042854	salidroside	Glycoside	IL6	Lianqiao
484	HBIN042854	salidroside	Glycoside	SIRT1	Lianqiao
485	HBIN042854	salidroside	Glycoside	MAPK3	Lianqiao
486	HBIN042854	salidroside	Glycoside	KAT2B	Lianqiao
487	HBIN042854	salidroside	Glycoside	MAPK1	Lianqiao
488	HBIN042854	salidroside	Glycoside	PIK3CD	Lianqiao
489	HBIN042854	salidroside	Glycoside	NOS2	Lianqiao
490	HBIN042854	salidroside	Glycoside	CDK2	Lianqiao
491	HBIN042854	salidroside	Glycoside	RELA	Lianqiao
492	HBIN042854	salidroside	Glycoside	CA2	Lianqiao
493	HBIN042854	salidroside	Glycoside	FGF2	Lianqiao
494	HBIN042854	salidroside	Glycoside	GSK3B	Lianqiao
495	HBIN042854	salidroside	Glycoside	MYHC	Lianqiao
496	HBIN042854	salidroside	Glycoside	BAX	Lianqiao
497	HBIN042854	salidroside	Glycoside	PIK3CB	Lianqiao
498	HBIN042854	salidroside	Glycoside	CYCS	Lianqiao
499	HBIN042854	salidroside	Glycoside	BCL2L1	Lianqiao
500	HBIN042854	salidroside	Glycoside	MTOR	Lianqiao
501	HBIN042854	salidroside	Glycoside	ADORA2A	Lianqiao
502	HBIN042854	salidroside	Glycoside	PGAM5	Lianqiao
503	HBIN042854	salidroside	Glycoside	HIF1A	Lianqiao
504	HBIN042854	salidroside	Glycoside	HMOX1	Lianqiao
505	HBIN042854	salidroside	Glycoside	MMP9	Lianqiao
506	HBIN042854	salidroside	Glycoside	MAPT	Lianqiao
507	HBIN042854	salidroside	Glycoside	PARP1	Lianqiao
508	HBIN042854	salidroside	Glycoside	PRKAB1	Lianqiao
509	HBIN042854	salidroside	Glycoside	PCK1	Lianqiao
510	HBIN042854	salidroside	Glycoside	TNF	Lianqiao
511	HBIN042854	salidroside	Glycoside	VEGFA	Lianqiao
512	HBIN042854	salidroside	Glycoside	DPP4	Lianqiao
513	HBIN042854	salidroside	Glycoside	G6PC	Lianqiao
514	HBIN042854	salidroside	Glycoside	PTGS2	Lianqiao
515	HBIN042854	salidroside	Glycoside	HGF	Lianqiao
516	HBIN042854	salidroside	Glycoside	MMP2	Lianqiao
517	HBIN042854	salidroside	Glycoside	PRKAA1	Lianqiao
518	HBIN042854	salidroside	Glycoside	BCL2	Lianqiao
519	HBIN020363	chlorogenic acid	Caffeoylquinic acid	CA2	Mahuang
520	HBIN020363	chlorogenic acid	Caffeoylquinic acid	ESR1	Mahuang
521	HBIN020363	chlorogenic acid	Caffeoylquinic acid	AR	Mahuang
522	HBIN020363	chlorogenic acid	Caffeoylquinic acid	PTGS2	Mahuang
523	HBIN020363	chlorogenic acid	Caffeoylquinic acid	TPO	Mahuang
524	HBIN020363	chlorogenic acid	Caffeoylquinic acid	NOS2	Mahuang
525	HBIN020363	chlorogenic acid	Caffeoylquinic acid	PRSS1	Mahuang
526	HBIN020363	chlorogenic acid	Caffeoylquinic acid	MT3	Mahuang
527	HBIN020363	chlorogenic acid	Caffeoylquinic acid	DPEP1	Mahuang
528	HBIN020363	chlorogenic acid	Caffeoylquinic acid	CA2	Jinyinhua
529	HBIN020363	chlorogenic acid	Caffeoylquinic acid	ESR1	Jinyinhua
530	HBIN020363	chlorogenic acid	Caffeoylquinic acid	AR	Jinyinhua
531	HBIN020363	chlorogenic acid	Caffeoylquinic acid	PTGS2	Jinyinhua
532	HBIN020363	chlorogenic acid	Caffeoylquinic acid	TPO	Jinyinhua
533	HBIN020363	chlorogenic acid	Caffeoylquinic acid	NOS2	Jinyinhua
534	HBIN020363	chlorogenic acid	Caffeoylquinic acid	PRSS1	Jinyinhua
535	HBIN020363	chlorogenic acid	Caffeoylquinic acid	MT3	Jinyinhua
536	HBIN020363	chlorogenic acid	Caffeoylquinic acid	DPEP1	Jinyinhua
537	HBIN020363	chlorogenic acid	Caffeoylquinic acid	CA2	Huangqin
538	HBIN020363	chlorogenic acid	Caffeoylquinic acid	ESR1	Huangqin
539	HBIN020363	chlorogenic acid	Caffeoylquinic acid	AR	Huangqin
540	HBIN020363	chlorogenic acid	Caffeoylquinic acid	PTGS2	Huangqin
541	HBIN020363	chlorogenic acid	Caffeoylquinic acid	TPO	Huangqin
542	HBIN020363	chlorogenic acid	Caffeoylquinic acid	NOS2	Huangqin
543	HBIN020363	chlorogenic acid	Caffeoylquinic acid	PRSS1	Huangqin
544	HBIN020363	chlorogenic acid	Caffeoylquinic acid	MT3	Huangqin
545	HBIN020363	chlorogenic acid	Caffeoylquinic acid	DPEP1	Huangqin
546	HBIN020363	chlorogenic acid	Caffeoylquinic acid	CA2	Niubangzi
547	HBIN020363	chlorogenic acid	Caffeoylquinic acid	ESR1	Niubangzi
548	HBIN020363	chlorogenic acid	Caffeoylquinic acid	AR	Niubangzi
549	HBIN020363	chlorogenic acid	Caffeoylquinic acid	PTGS2	Niubangzi
550	HBIN020363	chlorogenic acid	Caffeoylquinic acid	TPO	Niubangzi
551	HBIN020363	chlorogenic acid	Caffeoylquinic acid	NOS2	Niubangzi
552	HBIN020363	chlorogenic acid	Caffeoylquinic acid	PRSS1	Niubangzi
553	HBIN020363	chlorogenic acid	Caffeoylquinic acid	MT3	Niubangzi
554	HBIN020363	chlorogenic acid	Caffeoylquinic acid	DPEP1	Niubangzi
555	HBIN020363	chlorogenic acid	Caffeoylquinic acid	CA2	Lianqiao
556	HBIN020363	chlorogenic acid	Caffeoylquinic acid	ESR1	Lianqiao
557	HBIN020363	chlorogenic acid	Caffeoylquinic acid	AR	Lianqiao
558	HBIN020363	chlorogenic acid	Caffeoylquinic acid	PTGS2	Lianqiao
559	HBIN020363	chlorogenic acid	Caffeoylquinic acid	TPO	Lianqiao
560	HBIN020363	chlorogenic acid	Caffeoylquinic acid	NOS2	Lianqiao
561	HBIN020363	chlorogenic acid	Caffeoylquinic acid	PRSS1	Lianqiao
562	HBIN020363	chlorogenic acid	Caffeoylquinic acid	MT3	Lianqiao
563	HBIN020363	chlorogenic acid	Caffeoylquinic acid	DPEP1	Lianqiao
564	HBIN020363	chlorogenic acid	Caffeoylquinic acid	CA2	Kuxingren
565	HBIN020363	chlorogenic acid	Caffeoylquinic acid	ESR1	Kuxingren
566	HBIN020363	chlorogenic acid	Caffeoylquinic acid	AR	Kuxingren
567	HBIN020363	chlorogenic acid	Caffeoylquinic acid	PTGS2	Kuxingren
568	HBIN020363	chlorogenic acid	Caffeoylquinic acid	TPO	Kuxingren
569	HBIN020363	chlorogenic acid	Caffeoylquinic acid	NOS2	Kuxingren
570	HBIN020363	chlorogenic acid	Caffeoylquinic acid	PRSS1	Kuxingren
571	HBIN020363	chlorogenic acid	Caffeoylquinic acid	MT3	Kuxingren
572	HBIN020363	chlorogenic acid	Caffeoylquinic acid	DPEP1	Kuxingren
573	HBIN025796	esculetin	Coumarin	NFKB1	Lianqiao
574	HBIN025796	esculetin	Coumarin	CA9	Lianqiao
575	HBIN025796	esculetin	Coumarin	CASP9	Lianqiao
576	HBIN025796	esculetin	Coumarin	ROS1	Lianqiao
577	HBIN025796	esculetin	Coumarin	MAPK3	Lianqiao
578	HBIN025796	esculetin	Coumarin	NFE2L2	Lianqiao
579	HBIN025796	esculetin	Coumarin	ALOX5	Lianqiao
580	HBIN025796	esculetin	Coumarin	E2F1	Lianqiao
581	HBIN025796	esculetin	Coumarin	MAPK1	Lianqiao
582	HBIN025796	esculetin	Coumarin	MAPK8	Lianqiao
583	HBIN025796	esculetin	Coumarin	TNFRSF10A	Lianqiao
584	HBIN025796	esculetin	Coumarin	MAPK9	Lianqiao
585	HBIN025796	esculetin	Coumarin	CDK4	Lianqiao
586	HBIN025796	esculetin	Coumarin	CDK2	Lianqiao
587	HBIN025796	esculetin	Coumarin	RELA	Lianqiao
588	HBIN025796	esculetin	Coumarin	CDKN1A	Lianqiao
589	HBIN025796	esculetin	Coumarin	HERC5	Lianqiao
590	HBIN025796	esculetin	Coumarin	MMP3	Lianqiao
591	HBIN025796	esculetin	Coumarin	XDH	Lianqiao
592	HBIN025796	esculetin	Coumarin	SNCA	Lianqiao
593	HBIN025796	esculetin	Coumarin	MMP1	Lianqiao
594	HBIN025796	esculetin	Coumarin	CASP3	Lianqiao
595	HBIN025796	esculetin	Coumarin	SLC7A1	Lianqiao
596	HBIN025796	esculetin	Coumarin	MAPK14	Lianqiao
597	HBIN025796	esculetin	Coumarin	CASP8	Lianqiao
598	HBIN025796	esculetin	Coumarin	RB1	Lianqiao
599	HBIN025796	esculetin	Coumarin	KEAP1	Lianqiao
600	HBIN025796	esculetin	Coumarin	DDIT3	Lianqiao
601	HBIN025796	esculetin	Coumarin	NQO1	Lianqiao
602	HBIN025796	esculetin	Coumarin	BCL2	Lianqiao
603	HBIN047738	vanillic acid	Phenolic acid	ADRA2A	Mahuang
604	HBIN047738	vanillic acid	Phenolic acid	MAOA	Mahuang
605	HBIN047738	vanillic acid	Phenolic acid	CA2	Mahuang
606	HBIN047738	vanillic acid	Phenolic acid	TYRP1	Mahuang
607	HBIN047738	vanillic acid	Phenolic acid	MAOB	Mahuang
608	HBIN047738	vanillic acid	Phenolic acid	NOS3	Mahuang
609	HBIN047738	vanillic acid	Phenolic acid	CEBPA	Mahuang
610	HBIN047738	vanillic acid	Phenolic acid	AR	Mahuang
611	HBIN047738	vanillic acid	Phenolic acid	PTGS2	Mahuang
612	HBIN047738	vanillic acid	Phenolic acid	PTGS1	Mahuang
613	HBIN047738	vanillic acid	Phenolic acid	PRSS1	Mahuang
614	HBIN047738	vanillic acid	Phenolic acid	LYZ	Mahuang
615	HBIN047738	vanillic acid	Phenolic acid	DPEP1	Mahuang
616	HBIN047738	vanillic acid	Phenolic acid	PPARG	Mahuang
617	HBIN047738	vanillic acid	Phenolic acid	ADRA2A	Lianqiao
618	HBIN047738	vanillic acid	Phenolic acid	MAOA	Lianqiao
619	HBIN047738	vanillic acid	Phenolic acid	CA2	Lianqiao
620	HBIN047738	vanillic acid	Phenolic acid	TYRP1	Lianqiao
621	HBIN047738	vanillic acid	Phenolic acid	MAOB	Lianqiao
622	HBIN047738	vanillic acid	Phenolic acid	NOS3	Lianqiao
623	HBIN047738	vanillic acid	Phenolic acid	CEBPA	Lianqiao
624	HBIN047738	vanillic acid	Phenolic acid	AR	Lianqiao
625	HBIN047738	vanillic acid	Phenolic acid	PTGS2	Lianqiao
626	HBIN047738	vanillic acid	Phenolic acid	PTGS1	Lianqiao
627	HBIN047738	vanillic acid	Phenolic acid	PRSS1	Lianqiao
628	HBIN047738	vanillic acid	Phenolic acid	LYZ	Lianqiao
629	HBIN047738	vanillic acid	Phenolic acid	DPEP1	Lianqiao
630	HBIN047738	vanillic acid	Phenolic acid	PPARG	Lianqiao
631	HBIN019298	caffeic acid	Phenolic acid	ADRA2C	Mahuang
632	HBIN019298	caffeic acid	Phenolic acid	IGF2	Mahuang
633	HBIN019298	caffeic acid	Phenolic acid	ADRB1	Mahuang
634	HBIN019298	caffeic acid	Phenolic acid	PTGS1	Mahuang
635	HBIN019298	caffeic acid	Phenolic acid	DPEP1	Mahuang
636	HBIN019298	caffeic acid	Phenolic acid	ADRB2	Mahuang
637	HBIN019298	caffeic acid	Phenolic acid	ADRA1D	Mahuang
638	HBIN019298	caffeic acid	Phenolic acid	MAOA	Mahuang
639	HBIN019298	caffeic acid	Phenolic acid	RAC1	Mahuang
640	HBIN019298	caffeic acid	Phenolic acid	SLC6A3	Mahuang
641	HBIN019298	caffeic acid	Phenolic acid	PLAU	Mahuang
642	HBIN019298	caffeic acid	Phenolic acid	NOS2	Mahuang
643	HBIN019298	caffeic acid	Phenolic acid	CDK2	Mahuang
644	HBIN019298	caffeic acid	Phenolic acid	PRKCB	Mahuang
645	HBIN019298	caffeic acid	Phenolic acid	GFAP	Mahuang
646	HBIN019298	caffeic acid	Phenolic acid	ADRA2A	Mahuang
647	HBIN019298	caffeic acid	Phenolic acid	CA2	Mahuang
648	HBIN019298	caffeic acid	Phenolic acid	CTRB1	Mahuang
649	HBIN019298	caffeic acid	Phenolic acid	SELP	Mahuang
650	HBIN019298	caffeic acid	Phenolic acid	PRSS1	Mahuang
651	HBIN019298	caffeic acid	Phenolic acid	AKR1B1	Mahuang
652	HBIN019298	caffeic acid	Phenolic acid	LYZ	Mahuang
653	HBIN019298	caffeic acid	Phenolic acid	ACHE	Mahuang
654	HBIN019298	caffeic acid	Phenolic acid	CYP1A1	Mahuang
655	HBIN019298	caffeic acid	Phenolic acid	BTK	Mahuang
656	HBIN019298	caffeic acid	Phenolic acid	TNF	Mahuang
657	HBIN019298	caffeic acid	Phenolic acid	MAOB	Mahuang
658	HBIN019298	caffeic acid	Phenolic acid	PTGS2	Mahuang
659	HBIN019298	caffeic acid	Phenolic acid	DPP4	Mahuang
660	HBIN019298	caffeic acid	Phenolic acid	ADRA2C	Jinyinhua
661	HBIN019298	caffeic acid	Phenolic acid	IGF2	Jinyinhua
662	HBIN019298	caffeic acid	Phenolic acid	ADRB1	Jinyinhua
663	HBIN019298	caffeic acid	Phenolic acid	PTGS1	Jinyinhua
664	HBIN019298	caffeic acid	Phenolic acid	DPEP1	Jinyinhua
665	HBIN019298	caffeic acid	Phenolic acid	ADRB2	Jinyinhua
666	HBIN019298	caffeic acid	Phenolic acid	ADRA1D	Jinyinhua
667	HBIN019298	caffeic acid	Phenolic acid	MAOA	Jinyinhua
668	HBIN019298	caffeic acid	Phenolic acid	RAC1	Jinyinhua
669	HBIN019298	caffeic acid	Phenolic acid	SLC6A3	Jinyinhua
670	HBIN019298	caffeic acid	Phenolic acid	PLAU	Jinyinhua
671	HBIN019298	caffeic acid	Phenolic acid	NOS2	Jinyinhua
672	HBIN019298	caffeic acid	Phenolic acid	CDK2	Jinyinhua
673	HBIN019298	caffeic acid	Phenolic acid	PRKCB	Jinyinhua
674	HBIN019298	caffeic acid	Phenolic acid	GFAP	Jinyinhua
675	HBIN019298	caffeic acid	Phenolic acid	ADRA2A	Jinyinhua
676	HBIN019298	caffeic acid	Phenolic acid	CA2	Jinyinhua
677	HBIN019298	caffeic acid	Phenolic acid	CTRB1	Jinyinhua
678	HBIN019298	caffeic acid	Phenolic acid	SELP	Jinyinhua
679	HBIN019298	caffeic acid	Phenolic acid	PRSS1	Jinyinhua
680	HBIN019298	caffeic acid	Phenolic acid	AKR1B1	Jinyinhua
681	HBIN019298	caffeic acid	Phenolic acid	LYZ	Jinyinhua
682	HBIN019298	caffeic acid	Phenolic acid	ACHE	Jinyinhua
683	HBIN019298	caffeic acid	Phenolic acid	CYP1A1	Jinyinhua
684	HBIN019298	caffeic acid	Phenolic acid	BTK	Jinyinhua
685	HBIN019298	caffeic acid	Phenolic acid	TNF	Jinyinhua
686	HBIN019298	caffeic acid	Phenolic acid	MAOB	Jinyinhua
687	HBIN019298	caffeic acid	Phenolic acid	PTGS2	Jinyinhua
688	HBIN019298	caffeic acid	Phenolic acid	DPP4	Jinyinhua
689	HBIN019298	caffeic acid	Phenolic acid	ADRA2C	Qinghao
690	HBIN019298	caffeic acid	Phenolic acid	IGF2	Qinghao
691	HBIN019298	caffeic acid	Phenolic acid	ADRB1	Qinghao
692	HBIN019298	caffeic acid	Phenolic acid	PTGS1	Qinghao
693	HBIN019298	caffeic acid	Phenolic acid	DPEP1	Qinghao
694	HBIN019298	caffeic acid	Phenolic acid	ADRB2	Qinghao
695	HBIN019298	caffeic acid	Phenolic acid	ADRA1D	Qinghao
696	HBIN019298	caffeic acid	Phenolic acid	MAOA	Qinghao
697	HBIN019298	caffeic acid	Phenolic acid	RAC1	Qinghao
698	HBIN019298	caffeic acid	Phenolic acid	SLC6A3	Qinghao
699	HBIN019298	caffeic acid	Phenolic acid	PLAU	Qinghao
700	HBIN019298	caffeic acid	Phenolic acid	NOS2	Qinghao
701	HBIN019298	caffeic acid	Phenolic acid	CDK2	Qinghao
702	HBIN019298	caffeic acid	Phenolic acid	PRKCB	Qinghao
703	HBIN019298	caffeic acid	Phenolic acid	GFAP	Qinghao
704	HBIN019298	caffeic acid	Phenolic acid	ADRA2A	Qinghao
705	HBIN019298	caffeic acid	Phenolic acid	CA2	Qinghao
706	HBIN019298	caffeic acid	Phenolic acid	CTRB1	Qinghao
707	HBIN019298	caffeic acid	Phenolic acid	SELP	Qinghao
708	HBIN019298	caffeic acid	Phenolic acid	PRSS1	Qinghao
709	HBIN019298	caffeic acid	Phenolic acid	AKR1B1	Qinghao
710	HBIN019298	caffeic acid	Phenolic acid	LYZ	Qinghao
711	HBIN019298	caffeic acid	Phenolic acid	ACHE	Qinghao
712	HBIN019298	caffeic acid	Phenolic acid	CYP1A1	Qinghao
713	HBIN019298	caffeic acid	Phenolic acid	BTK	Qinghao
714	HBIN019298	caffeic acid	Phenolic acid	TNF	Qinghao
715	HBIN019298	caffeic acid	Phenolic acid	MAOB	Qinghao
716	HBIN019298	caffeic acid	Phenolic acid	PTGS2	Qinghao
717	HBIN019298	caffeic acid	Phenolic acid	DPP4	Qinghao
718	HBIN019298	caffeic acid	Phenolic acid	ADRA2C	Niubangzi
719	HBIN019298	caffeic acid	Phenolic acid	IGF2	Niubangzi
720	HBIN019298	caffeic acid	Phenolic acid	ADRB1	Niubangzi
721	HBIN019298	caffeic acid	Phenolic acid	PTGS1	Niubangzi
722	HBIN019298	caffeic acid	Phenolic acid	DPEP1	Niubangzi
723	HBIN019298	caffeic acid	Phenolic acid	ADRB2	Niubangzi
724	HBIN019298	caffeic acid	Phenolic acid	ADRA1D	Niubangzi
725	HBIN019298	caffeic acid	Phenolic acid	MAOA	Niubangzi
726	HBIN019298	caffeic acid	Phenolic acid	RAC1	Niubangzi
727	HBIN019298	caffeic acid	Phenolic acid	SLC6A3	Niubangzi
728	HBIN019298	caffeic acid	Phenolic acid	PLAU	Niubangzi
729	HBIN019298	caffeic acid	Phenolic acid	NOS2	Niubangzi
730	HBIN019298	caffeic acid	Phenolic acid	CDK2	Niubangzi
731	HBIN019298	caffeic acid	Phenolic acid	PRKCB	Niubangzi
732	HBIN019298	caffeic acid	Phenolic acid	GFAP	Niubangzi
733	HBIN019298	caffeic acid	Phenolic acid	ADRA2A	Niubangzi
734	HBIN019298	caffeic acid	Phenolic acid	CA2	Niubangzi
735	HBIN019298	caffeic acid	Phenolic acid	CTRB1	Niubangzi
736	HBIN019298	caffeic acid	Phenolic acid	SELP	Niubangzi
737	HBIN019298	caffeic acid	Phenolic acid	PRSS1	Niubangzi
738	HBIN019298	caffeic acid	Phenolic acid	AKR1B1	Niubangzi
739	HBIN019298	caffeic acid	Phenolic acid	LYZ	Niubangzi
740	HBIN019298	caffeic acid	Phenolic acid	ACHE	Niubangzi
741	HBIN019298	caffeic acid	Phenolic acid	CYP1A1	Niubangzi
742	HBIN019298	caffeic acid	Phenolic acid	BTK	Niubangzi
743	HBIN019298	caffeic acid	Phenolic acid	TNF	Niubangzi
744	HBIN019298	caffeic acid	Phenolic acid	MAOB	Niubangzi
745	HBIN019298	caffeic acid	Phenolic acid	PTGS2	Niubangzi
746	HBIN019298	caffeic acid	Phenolic acid	DPP4	Niubangzi
747	HBIN019298	caffeic acid	Phenolic acid	ADRA2C	Lianqiao
748	HBIN019298	caffeic acid	Phenolic acid	IGF2	Lianqiao
749	HBIN019298	caffeic acid	Phenolic acid	ADRB1	Lianqiao
750	HBIN019298	caffeic acid	Phenolic acid	PTGS1	Lianqiao
751	HBIN019298	caffeic acid	Phenolic acid	DPEP1	Lianqiao
752	HBIN019298	caffeic acid	Phenolic acid	ADRB2	Lianqiao
753	HBIN019298	caffeic acid	Phenolic acid	ADRA1D	Lianqiao
754	HBIN019298	caffeic acid	Phenolic acid	MAOA	Lianqiao
755	HBIN019298	caffeic acid	Phenolic acid	RAC1	Lianqiao
756	HBIN019298	caffeic acid	Phenolic acid	SLC6A3	Lianqiao
757	HBIN019298	caffeic acid	Phenolic acid	PLAU	Lianqiao
758	HBIN019298	caffeic acid	Phenolic acid	NOS2	Lianqiao
759	HBIN019298	caffeic acid	Phenolic acid	CDK2	Lianqiao
760	HBIN019298	caffeic acid	Phenolic acid	PRKCB	Lianqiao
761	HBIN019298	caffeic acid	Phenolic acid	GFAP	Lianqiao
762	HBIN019298	caffeic acid	Phenolic acid	ADRA2A	Lianqiao
763	HBIN019298	caffeic acid	Phenolic acid	CA2	Lianqiao
764	HBIN019298	caffeic acid	Phenolic acid	CTRB1	Lianqiao
765	HBIN019298	caffeic acid	Phenolic acid	SELP	Lianqiao
766	HBIN019298	caffeic acid	Phenolic acid	PRSS1	Lianqiao
767	HBIN019298	caffeic acid	Phenolic acid	AKR1B1	Lianqiao
768	HBIN019298	caffeic acid	Phenolic acid	LYZ	Lianqiao
769	HBIN019298	caffeic acid	Phenolic acid	ACHE	Lianqiao
770	HBIN019298	caffeic acid	Phenolic acid	CYP1A1	Lianqiao
771	HBIN019298	caffeic acid	Phenolic acid	BTK	Lianqiao
772	HBIN019298	caffeic acid	Phenolic acid	TNF	Lianqiao
773	HBIN019298	caffeic acid	Phenolic acid	MAOB	Lianqiao
774	HBIN019298	caffeic acid	Phenolic acid	PTGS2	Lianqiao
775	HBIN019298	caffeic acid	Phenolic acid	DPP4	Lianqiao
776	HBIN019298	caffeic acid	Phenolic acid	ADRA2C	Kuxingren
777	HBIN019298	caffeic acid	Phenolic acid	IGF2	Kuxingren
778	HBIN019298	caffeic acid	Phenolic acid	ADRB1	Kuxingren
779	HBIN019298	caffeic acid	Phenolic acid	PTGS1	Kuxingren
780	HBIN019298	caffeic acid	Phenolic acid	DPEP1	Kuxingren
781	HBIN019298	caffeic acid	Phenolic acid	ADRB2	Kuxingren
782	HBIN019298	caffeic acid	Phenolic acid	ADRA1D	Kuxingren
783	HBIN019298	caffeic acid	Phenolic acid	MAOA	Kuxingren
784	HBIN019298	caffeic acid	Phenolic acid	RAC1	Kuxingren
785	HBIN019298	caffeic acid	Phenolic acid	SLC6A3	Kuxingren
786	HBIN019298	caffeic acid	Phenolic acid	PLAU	Kuxingren
787	HBIN019298	caffeic acid	Phenolic acid	NOS2	Kuxingren
788	HBIN019298	caffeic acid	Phenolic acid	CDK2	Kuxingren
789	HBIN019298	caffeic acid	Phenolic acid	PRKCB	Kuxingren
790	HBIN019298	caffeic acid	Phenolic acid	GFAP	Kuxingren
791	HBIN019298	caffeic acid	Phenolic acid	ADRA2A	Kuxingren
792	HBIN019298	caffeic acid	Phenolic acid	CA2	Kuxingren
793	HBIN019298	caffeic acid	Phenolic acid	CTRB1	Kuxingren
794	HBIN019298	caffeic acid	Phenolic acid	SELP	Kuxingren
795	HBIN019298	caffeic acid	Phenolic acid	PRSS1	Kuxingren
796	HBIN019298	caffeic acid	Phenolic acid	AKR1B1	Kuxingren
797	HBIN019298	caffeic acid	Phenolic acid	LYZ	Kuxingren
798	HBIN019298	caffeic acid	Phenolic acid	ACHE	Kuxingren
799	HBIN019298	caffeic acid	Phenolic acid	CYP1A1	Kuxingren
800	HBIN019298	caffeic acid	Phenolic acid	BTK	Kuxingren
801	HBIN019298	caffeic acid	Phenolic acid	TNF	Kuxingren
802	HBIN019298	caffeic acid	Phenolic acid	MAOB	Kuxingren
803	HBIN019298	caffeic acid	Phenolic acid	PTGS2	Kuxingren
804	HBIN019298	caffeic acid	Phenolic acid	DPP4	Kuxingren
805	HBIN019307	caffeine	Alkaloid	NPS	Niubangzi
806	HBIN019307	caffeine	Alkaloid	POLD1	Niubangzi
807	HBIN019307	caffeine	Alkaloid	DRD2	Niubangzi
808	HBIN019307	caffeine	Alkaloid	FOS	Niubangzi
809	HBIN019307	caffeine	Alkaloid	JUN	Niubangzi
810	HBIN019307	caffeine	Alkaloid	ARC	Niubangzi
811	HBIN019307	caffeine	Alkaloid	TP53	Niubangzi
812	HBIN019307	caffeine	Alkaloid	TDP1	Niubangzi
813	HBIN019307	caffeine	Alkaloid	GABRA1	Niubangzi
814	HBIN019307	caffeine	Alkaloid	PTGS1	Niubangzi
815	HBIN019307	caffeine	Alkaloid	GRIA2	Niubangzi
816	HBIN019307	caffeine	Alkaloid	CDK1	Niubangzi
817	HBIN019307	caffeine	Alkaloid	ATM	Niubangzi
818	HBIN019307	caffeine	Alkaloid	ADRB2	Niubangzi
819	HBIN019307	caffeine	Alkaloid	CASP9	Niubangzi
820	HBIN019307	caffeine	Alkaloid	NPSR1	Niubangzi
821	HBIN019307	caffeine	Alkaloid	GABRA2	Niubangzi
822	HBIN019307	caffeine	Alkaloid	ADIPOQ	Niubangzi
823	HBIN019307	caffeine	Alkaloid	IL6	Niubangzi
824	HBIN019307	caffeine	Alkaloid	MAPK3	Niubangzi
825	HBIN019307	caffeine	Alkaloid	TFAM	Niubangzi
826	HBIN019307	caffeine	Alkaloid	DBT	Niubangzi
827	HBIN019307	caffeine	Alkaloid	E2F1	Niubangzi
828	HBIN019307	caffeine	Alkaloid	ITGB3	Niubangzi
829	HBIN019307	caffeine	Alkaloid	MAPK1	Niubangzi
830	HBIN019307	caffeine	Alkaloid	CRLF1	Niubangzi
831	HBIN019307	caffeine	Alkaloid	PDE4B	Niubangzi
832	HBIN019307	caffeine	Alkaloid	PDE3A	Niubangzi
833	HBIN019307	caffeine	Alkaloid	NOS2	Niubangzi
834	HBIN019307	caffeine	Alkaloid	LHB	Niubangzi
835	HBIN019307	caffeine	Alkaloid	ADORA1	Niubangzi
836	HBIN019307	caffeine	Alkaloid	CDK2	Niubangzi
837	HBIN019307	caffeine	Alkaloid	ZFHX3	Niubangzi
838	HBIN019307	caffeine	Alkaloid	CDKN1A	Niubangzi
839	HBIN019307	caffeine	Alkaloid	EGR1	Niubangzi
840	HBIN019307	caffeine	Alkaloid	RUNX1T1	Niubangzi
841	HBIN019307	caffeine	Alkaloid	ADORA3	Niubangzi
842	HBIN019307	caffeine	Alkaloid	RELA	Niubangzi
843	HBIN019307	caffeine	Alkaloid	CTNNB1	Niubangzi
844	HBIN019307	caffeine	Alkaloid	CA2	Niubangzi
845	HBIN019307	caffeine	Alkaloid	SLC2A4	Niubangzi
846	HBIN019307	caffeine	Alkaloid	PIM1	Niubangzi
847	HBIN019307	caffeine	Alkaloid	BAX	Niubangzi
848	HBIN019307	caffeine	Alkaloid	CYP1A2	Niubangzi
849	HBIN019307	caffeine	Alkaloid	INS	Niubangzi
850	HBIN019307	caffeine	Alkaloid	CASP3	Niubangzi
851	HBIN019307	caffeine	Alkaloid	RASGRF1	Niubangzi
852	HBIN019307	caffeine	Alkaloid	ADORA2A	Niubangzi
853	HBIN019307	caffeine	Alkaloid	ACHE	Niubangzi
854	HBIN019307	caffeine	Alkaloid	MEF2A	Niubangzi
855	HBIN019307	caffeine	Alkaloid	FSHB	Niubangzi
856	HBIN019307	caffeine	Alkaloid	CHRNA4	Niubangzi
857	HBIN019307	caffeine	Alkaloid	TNF	Niubangzi
858	HBIN019307	caffeine	Alkaloid	NEK11	Niubangzi
859	HBIN019307	caffeine	Alkaloid	CCN2	Niubangzi
860	HBIN019307	caffeine	Alkaloid	PTGS2	Niubangzi
861	HBIN019307	caffeine	Alkaloid	KCNJ11	Niubangzi
862	HBIN019307	caffeine	Alkaloid	SLC6A2	Niubangzi
863	HBIN019307	caffeine	Alkaloid	IER5	Niubangzi
864	HBIN019307	caffeine	Alkaloid	MEF2D	Niubangzi
865	HBIN019307	caffeine	Alkaloid	DPP4	Niubangzi
866	HBIN034394	mangiferin	Xanthone	CAT	Zhimu
867	HBIN034394	mangiferin	Xanthone	PPARA	Zhimu
868	HBIN034394	mangiferin	Xanthone	RELA	Zhimu
869	HBIN034394	mangiferin	Xanthone	SOD1	Zhimu
870	HBIN043442	scopoletin	Coumarin	PRKAA2	Mahuang
871	HBIN043442	scopoletin	Coumarin	CAT	Mahuang
872	HBIN043442	scopoletin	Coumarin	SREBF1	Mahuang
873	HBIN043442	scopoletin	Coumarin	MITF	Mahuang
874	HBIN043442	scopoletin	Coumarin	CYP2E1	Mahuang
875	HBIN043442	scopoletin	Coumarin	CASP3	Mahuang
876	HBIN043442	scopoletin	Coumarin	PRKAA1	Mahuang
877	HBIN043442	scopoletin	Coumarin	PRKAA2	Qinghao
878	HBIN043442	scopoletin	Coumarin	CAT	Qinghao
879	HBIN043442	scopoletin	Coumarin	SREBF1	Qinghao
880	HBIN043442	scopoletin	Coumarin	MITF	Qinghao
881	HBIN043442	scopoletin	Coumarin	CYP2E1	Qinghao
882	HBIN043442	scopoletin	Coumarin	CASP3	Qinghao
883	HBIN043442	scopoletin	Coumarin	PRKAA1	Qinghao
884	HBIN026465	ferulic acid	Phenolic acid	ESR1	Mahuang
885	HBIN026465	ferulic acid	Phenolic acid	ADRB1	Mahuang
886	HBIN026465	ferulic acid	Phenolic acid	PTGS1	Mahuang
887	HBIN026465	ferulic acid	Phenolic acid	DPEP1	Mahuang
888	HBIN026465	ferulic acid	Phenolic acid	ADRB2	Mahuang
889	HBIN026465	ferulic acid	Phenolic acid	ADRA1D	Mahuang
890	HBIN026465	ferulic acid	Phenolic acid	MAOA	Mahuang
891	HBIN026465	ferulic acid	Phenolic acid	SLC6A3	Mahuang
892	HBIN026465	ferulic acid	Phenolic acid	NOS2	Mahuang
893	HBIN026465	ferulic acid	Phenolic acid	CDK2	Mahuang
894	HBIN026465	ferulic acid	Phenolic acid	ADRA2A	Mahuang
895	HBIN026465	ferulic acid	Phenolic acid	CHRM2	Mahuang
896	HBIN026465	ferulic acid	Phenolic acid	CA2	Mahuang
897	HBIN026465	ferulic acid	Phenolic acid	LTA4H	Mahuang
898	HBIN026465	ferulic acid	Phenolic acid	PRSS1	Mahuang
899	HBIN026465	ferulic acid	Phenolic acid	ADRA2B	Mahuang
900	HBIN026465	ferulic acid	Phenolic acid	MAOB	Mahuang
901	HBIN026465	ferulic acid	Phenolic acid	PTGS2	Mahuang
902	HBIN026465	ferulic acid	Phenolic acid	PKIA	Mahuang
903	HBIN026465	ferulic acid	Phenolic acid	SLC6A2	Mahuang
904	HBIN026465	ferulic acid	Phenolic acid	CHRM1	Mahuang
905	HBIN026465	ferulic acid	Phenolic acid	DPP4	Mahuang
906	HBIN026465	ferulic acid	Phenolic acid	ESR1	Huangqin
907	HBIN026465	ferulic acid	Phenolic acid	ADRB1	Huangqin
908	HBIN026465	ferulic acid	Phenolic acid	PTGS1	Huangqin
909	HBIN026465	ferulic acid	Phenolic acid	DPEP1	Huangqin
910	HBIN026465	ferulic acid	Phenolic acid	ADRB2	Huangqin
911	HBIN026465	ferulic acid	Phenolic acid	ADRA1D	Huangqin
912	HBIN026465	ferulic acid	Phenolic acid	MAOA	Huangqin
913	HBIN026465	ferulic acid	Phenolic acid	SLC6A3	Huangqin
914	HBIN026465	ferulic acid	Phenolic acid	NOS2	Huangqin
915	HBIN026465	ferulic acid	Phenolic acid	CDK2	Huangqin
916	HBIN026465	ferulic acid	Phenolic acid	ADRA2A	Huangqin
917	HBIN026465	ferulic acid	Phenolic acid	CHRM2	Huangqin
918	HBIN026465	ferulic acid	Phenolic acid	CA2	Huangqin
919	HBIN026465	ferulic acid	Phenolic acid	LTA4H	Huangqin
920	HBIN026465	ferulic acid	Phenolic acid	PRSS1	Huangqin
921	HBIN026465	ferulic acid	Phenolic acid	ADRA2B	Huangqin
922	HBIN026465	ferulic acid	Phenolic acid	MAOB	Huangqin
923	HBIN026465	ferulic acid	Phenolic acid	PTGS2	Huangqin
924	HBIN026465	ferulic acid	Phenolic acid	PKIA	Huangqin
925	HBIN026465	ferulic acid	Phenolic acid	SLC6A2	Huangqin
926	HBIN026465	ferulic acid	Phenolic acid	CHRM1	Huangqin
927	HBIN026465	ferulic acid	Phenolic acid	DPP4	Huangqin
928	HBIN026465	ferulic acid	Phenolic acid	ESR1	Lianqiao
929	HBIN026465	ferulic acid	Phenolic acid	ADRB1	Lianqiao
930	HBIN026465	ferulic acid	Phenolic acid	PTGS1	Lianqiao
931	HBIN026465	ferulic acid	Phenolic acid	DPEP1	Lianqiao
932	HBIN026465	ferulic acid	Phenolic acid	ADRB2	Lianqiao
933	HBIN026465	ferulic acid	Phenolic acid	ADRA1D	Lianqiao
934	HBIN026465	ferulic acid	Phenolic acid	MAOA	Lianqiao
935	HBIN026465	ferulic acid	Phenolic acid	SLC6A3	Lianqiao
936	HBIN026465	ferulic acid	Phenolic acid	NOS2	Lianqiao
937	HBIN026465	ferulic acid	Phenolic acid	CDK2	Lianqiao
938	HBIN026465	ferulic acid	Phenolic acid	ADRA2A	Lianqiao
939	HBIN026465	ferulic acid	Phenolic acid	CHRM2	Lianqiao
940	HBIN026465	ferulic acid	Phenolic acid	CA2	Lianqiao
941	HBIN026465	ferulic acid	Phenolic acid	LTA4H	Lianqiao
942	HBIN026465	ferulic acid	Phenolic acid	PRSS1	Lianqiao
943	HBIN026465	ferulic acid	Phenolic acid	ADRA2B	Lianqiao
944	HBIN026465	ferulic acid	Phenolic acid	MAOB	Lianqiao
945	HBIN026465	ferulic acid	Phenolic acid	PTGS2	Lianqiao
946	HBIN026465	ferulic acid	Phenolic acid	PKIA	Lianqiao
947	HBIN026465	ferulic acid	Phenolic acid	SLC6A2	Lianqiao
948	HBIN026465	ferulic acid	Phenolic acid	CHRM1	Lianqiao
949	HBIN026465	ferulic acid	Phenolic acid	DPP4	Lianqiao
950	HBIN026465	ferulic acid	Phenolic acid	ESR1	Kuxingren
951	HBIN026465	ferulic acid	Phenolic acid	ADRB1	Kuxingren
952	HBIN026465	ferulic acid	Phenolic acid	PTGS1	Kuxingren
953	HBIN026465	ferulic acid	Phenolic acid	DPEP1	Kuxingren
954	HBIN026465	ferulic acid	Phenolic acid	ADRB2	Kuxingren
955	HBIN026465	ferulic acid	Phenolic acid	ADRA1D	Kuxingren
956	HBIN026465	ferulic acid	Phenolic acid	MAOA	Kuxingren
957	HBIN026465	ferulic acid	Phenolic acid	SLC6A3	Kuxingren
958	HBIN026465	ferulic acid	Phenolic acid	NOS2	Kuxingren
959	HBIN026465	ferulic acid	Phenolic acid	CDK2	Kuxingren
960	HBIN026465	ferulic acid	Phenolic acid	ADRA2A	Kuxingren
961	HBIN026465	ferulic acid	Phenolic acid	CHRM2	Kuxingren
962	HBIN026465	ferulic acid	Phenolic acid	CA2	Kuxingren
963	HBIN026465	ferulic acid	Phenolic acid	LTA4H	Kuxingren
964	HBIN026465	ferulic acid	Phenolic acid	PRSS1	Kuxingren
965	HBIN026465	ferulic acid	Phenolic acid	ADRA2B	Kuxingren
966	HBIN026465	ferulic acid	Phenolic acid	MAOB	Kuxingren
967	HBIN026465	ferulic acid	Phenolic acid	PTGS2	Kuxingren
968	HBIN026465	ferulic acid	Phenolic acid	PKIA	Kuxingren
969	HBIN026465	ferulic acid	Phenolic acid	SLC6A2	Kuxingren
970	HBIN026465	ferulic acid	Phenolic acid	CHRM1	Kuxingren
971	HBIN026465	ferulic acid	Phenolic acid	DPP4	Kuxingren
972	HBIN033383	liquiritin	Saponin	F7	Gancao
973	HBIN033383	liquiritin	Saponin	ESR1	Gancao
974	HBIN033383	liquiritin	Saponin	CALM3	Gancao
975	HBIN033383	liquiritin	Saponin	CA2	Gancao
976	HBIN033383	liquiritin	Saponin	DPP4	Gancao
977	HBIN033383	liquiritin	Saponin	CCNA2	Gancao
978	HBIN033383	liquiritin	Saponin	PIM1	Gancao
979	HBIN033383	liquiritin	Saponin	AR	Gancao
980	HBIN033383	liquiritin	Saponin	PTGS2	Gancao
981	HBIN033383	liquiritin	Saponin	KDR	Gancao
982	HBIN033383	liquiritin	Saponin	NOS2	Gancao
983	HBIN033383	liquiritin	Saponin	SOD1	Gancao
984	HBIN033383	liquiritin	Saponin	PPARG	Gancao
985	HBIN048102	vitexin	Flavonoid	CHKB	Mahuang
986	HBIN048102	vitexin	Flavonoid	ESR1	Mahuang
987	HBIN048102	vitexin	Flavonoid	TJP1	Mahuang
988	HBIN048102	vitexin	Flavonoid	GSK3B	Mahuang
989	HBIN048102	vitexin	Flavonoid	PIM1	Mahuang
990	HBIN048102	vitexin	Flavonoid	SLC12A2	Mahuang
991	HBIN048102	vitexin	Flavonoid	AR	Mahuang
992	HBIN048102	vitexin	Flavonoid	PTGS2	Mahuang
993	HBIN048102	vitexin	Flavonoid	MAPK7	Mahuang
994	HBIN048102	vitexin	Flavonoid	CHKB	Zhimu
995	HBIN048102	vitexin	Flavonoid	ESR1	Zhimu
996	HBIN048102	vitexin	Flavonoid	TJP1	Zhimu
997	HBIN048102	vitexin	Flavonoid	GSK3B	Zhimu
998	HBIN048102	vitexin	Flavonoid	PIM1	Zhimu
999	HBIN048102	vitexin	Flavonoid	SLC12A2	Zhimu
1000	HBIN048102	vitexin	Flavonoid	AR	Zhimu
1001	HBIN048102	vitexin	Flavonoid	PTGS2	Zhimu
1002	HBIN048102	vitexin	Flavonoid	MAPK7	Zhimu
1003	HBIN026701	forsythoside b	Phenylpropanoid	HMOX1	Lianqiao
1004	HBIN026701	forsythoside b	Phenylpropanoid	BACH1	Lianqiao
1005	HBIN014630	acteoside	Phenylpropanoid	MAP3K14	Huangqin
1006	HBIN014630	acteoside	Phenylpropanoid	NOS2	Huangqin
1007	HBIN014630	acteoside	Phenylpropanoid	ICAM1	Huangqin
1008	HBIN014630	acteoside	Phenylpropanoid	MAP3K14	Lianqiao
1009	HBIN014630	acteoside	Phenylpropanoid	NOS2	Lianqiao
1010	HBIN014630	acteoside	Phenylpropanoid	ICAM1	Lianqiao
1011	HBIN042199	rhein	Anthraquinone	KL	Mahuang
1012	HBIN042199	rhein	Anthraquinone	JUN	Mahuang
1013	HBIN042199	rhein	Anthraquinone	ESR1	Mahuang
1014	HBIN042199	rhein	Anthraquinone	CHEK1	Mahuang
1015	HBIN042199	rhein	Anthraquinone	CASP1	Mahuang
1016	HBIN042199	rhein	Anthraquinone	PTGS1	Mahuang
1017	HBIN042199	rhein	Anthraquinone	IL1B	Mahuang
1018	HBIN042199	rhein	Anthraquinone	DPEP1	Mahuang
1019	HBIN042199	rhein	Anthraquinone	NCOA2	Mahuang
1020	HBIN042199	rhein	Anthraquinone	IL6	Mahuang
1021	HBIN042199	rhein	Anthraquinone	DNMT3A	Mahuang
1022	HBIN042199	rhein	Anthraquinone	CCNA2	Mahuang
1023	HBIN042199	rhein	Anthraquinone	AR	Mahuang
1024	HBIN042199	rhein	Anthraquinone	ESR2	Mahuang
1025	HBIN042199	rhein	Anthraquinone	BCL2	Mahuang
1026	HBIN042199	rhein	Anthraquinone	NOS2	Mahuang
1027	HBIN042199	rhein	Anthraquinone	IKBKB	Mahuang
1028	HBIN042199	rhein	Anthraquinone	CDK2	Mahuang
1029	HBIN042199	rhein	Anthraquinone	CA2	Mahuang
1030	HBIN042199	rhein	Anthraquinone	GSK3B	Mahuang
1031	HBIN042199	rhein	Anthraquinone	PIM1	Mahuang
1032	HBIN042199	rhein	Anthraquinone	BAX	Mahuang
1033	HBIN042199	rhein	Anthraquinone	EGFR	Mahuang
1034	HBIN042199	rhein	Anthraquinone	DNMT1	Mahuang
1035	HBIN042199	rhein	Anthraquinone	CASP3	Mahuang
1036	HBIN042199	rhein	Anthraquinone	AKR1B1	Mahuang
1037	HBIN042199	rhein	Anthraquinone	STAT3	Mahuang
1038	HBIN042199	rhein	Anthraquinone	PARP1	Mahuang
1039	HBIN042199	rhein	Anthraquinone	DPP4	Mahuang
1040	HBIN042199	rhein	Anthraquinone	TNF	Mahuang
1041	HBIN042199	rhein	Anthraquinone	MAPK14	Mahuang
1042	HBIN042199	rhein	Anthraquinone	PTGS2	Mahuang
1043	HBIN042199	rhein	Anthraquinone	PPARG	Mahuang
1044	HBIN043437	scoparone	Coumarin	DECR1	Mixed
1045	HBIN043437	scoparone	Coumarin	ESR1	Mixed
1046	HBIN043437	scoparone	Coumarin	GABRA1	Mixed
1047	HBIN043437	scoparone	Coumarin	PTGS1	Mixed
1048	HBIN043437	scoparone	Coumarin	GRIA2	Mixed
1049	HBIN043437	scoparone	Coumarin	CXCL8	Mixed
1050	HBIN043437	scoparone	Coumarin	NOS1	Mixed
1051	HBIN043437	scoparone	Coumarin	ADRB2	Mixed
1052	HBIN043437	scoparone	Coumarin	DPEP1	Mixed
1053	HBIN043437	scoparone	Coumarin	CCNA2	Mixed
1054	HBIN043437	scoparone	Coumarin	NOS2	Mixed
1055	HBIN043437	scoparone	Coumarin	PPARG	Mixed
1056	HBIN043437	scoparone	Coumarin	CDK2	Mixed
1057	HBIN043437	scoparone	Coumarin	RELA	Mixed
1058	HBIN043437	scoparone	Coumarin	MTRR	Mixed
1059	HBIN043437	scoparone	Coumarin	TYW1	Mixed
1060	HBIN043437	scoparone	Coumarin	DCT	Mixed
1061	HBIN043437	scoparone	Coumarin	CA2	Mixed
1062	HBIN043437	scoparone	Coumarin	LTA4H	Mixed
1063	HBIN043437	scoparone	Coumarin	PIM1	Mixed
1064	HBIN043437	scoparone	Coumarin	NOS3	Mixed
1065	HBIN043437	scoparone	Coumarin	POR	Mixed
1066	HBIN043437	scoparone	Coumarin	TYR	Mixed
1067	HBIN043437	scoparone	Coumarin	NDOR1	Mixed
1068	HBIN043437	scoparone	Coumarin	SLC6A4	Mixed
1069	HBIN043437	scoparone	Coumarin	DPP4	Mixed
1070	HBIN043437	scoparone	Coumarin	TYRP1	Mixed
1071	HBIN043437	scoparone	Coumarin	MAOB	Mixed
1072	HBIN043437	scoparone	Coumarin	CCL2	Mixed
1073	HBIN043437	scoparone	Coumarin	PTGS2	Mixed
1074	HBIN043437	scoparone	Coumarin	PKIA	Mixed
1075	HBIN043437	scoparone	Coumarin	CHRM1	Mixed
1076	HBIN043437	scoparone	Coumarin	NFKBIA	Mixed
1077	HBIN042670	rutin	Flavonoid	DIO1	Mahuang
1078	HBIN042670	rutin	Flavonoid	HAS2	Mahuang
1079	HBIN042670	rutin	Flavonoid	STAT4	Mahuang
1080	HBIN042670	rutin	Flavonoid	CXCL8	Mahuang
1081	HBIN042670	rutin	Flavonoid	IL1B	Mahuang
1082	HBIN042670	rutin	Flavonoid	HMGCR	Mahuang
1083	HBIN042670	rutin	Flavonoid	TBXAS1	Mahuang
1084	HBIN042670	rutin	Flavonoid	IL6	Mahuang
1085	HBIN042670	rutin	Flavonoid	SIRT1	Mahuang
1086	HBIN042670	rutin	Flavonoid	TFAM	Mahuang
1087	HBIN042670	rutin	Flavonoid	ALOX5	Mahuang
1088	HBIN042670	rutin	Flavonoid	FCER2	Mahuang
1089	HBIN042670	rutin	Flavonoid	NOS2	Mahuang
1090	HBIN042670	rutin	Flavonoid	S100A8	Mahuang
1091	HBIN042670	rutin	Flavonoid	UCP1	Mahuang
1092	HBIN042670	rutin	Flavonoid	C5AR1	Mahuang
1093	HBIN042670	rutin	Flavonoid	PRKCB	Mahuang
1094	HBIN042670	rutin	Flavonoid	RELA	Mahuang
1095	HBIN042670	rutin	Flavonoid	PPARGC1A	Mahuang
1096	HBIN042670	rutin	Flavonoid	CAT	Mahuang
1097	HBIN042670	rutin	Flavonoid	GSTP1	Mahuang
1098	HBIN042670	rutin	Flavonoid	INS	Mahuang
1099	HBIN042670	rutin	Flavonoid	CASP3	Mahuang
1100	HBIN042670	rutin	Flavonoid	POR	Mahuang
1101	HBIN042670	rutin	Flavonoid	SOD1	Mahuang
1102	HBIN042670	rutin	Flavonoid	CXCL1	Mahuang
1103	HBIN042670	rutin	Flavonoid	TNF	Mahuang
1104	HBIN042670	rutin	Flavonoid	MPO	Mahuang
1105	HBIN042670	rutin	Flavonoid	ITGB2	Mahuang
1106	HBIN042670	rutin	Flavonoid	TBXA2R	Mahuang
1107	HBIN042670	rutin	Flavonoid	IFNG	Mahuang
1108	HBIN042670	rutin	Flavonoid	DIO1	Jinyinhua
1109	HBIN042670	rutin	Flavonoid	HAS2	Jinyinhua
1110	HBIN042670	rutin	Flavonoid	STAT4	Jinyinhua
1111	HBIN042670	rutin	Flavonoid	CXCL8	Jinyinhua
1112	HBIN042670	rutin	Flavonoid	IL1B	Jinyinhua
1113	HBIN042670	rutin	Flavonoid	HMGCR	Jinyinhua
1114	HBIN042670	rutin	Flavonoid	TBXAS1	Jinyinhua
1115	HBIN042670	rutin	Flavonoid	IL6	Jinyinhua
1116	HBIN042670	rutin	Flavonoid	SIRT1	Jinyinhua
1117	HBIN042670	rutin	Flavonoid	TFAM	Jinyinhua
1118	HBIN042670	rutin	Flavonoid	ALOX5	Jinyinhua
1119	HBIN042670	rutin	Flavonoid	FCER2	Jinyinhua
1120	HBIN042670	rutin	Flavonoid	NOS2	Jinyinhua
1121	HBIN042670	rutin	Flavonoid	S100A8	Jinyinhua
1122	HBIN042670	rutin	Flavonoid	UCP1	Jinyinhua
1123	HBIN042670	rutin	Flavonoid	C5AR1	Jinyinhua
1124	HBIN042670	rutin	Flavonoid	PRKCB	Jinyinhua
1125	HBIN042670	rutin	Flavonoid	RELA	Jinyinhua
1126	HBIN042670	rutin	Flavonoid	PPARGC1A	Jinyinhua
1127	HBIN042670	rutin	Flavonoid	CAT	Jinyinhua
1128	HBIN042670	rutin	Flavonoid	GSTP1	Jinyinhua
1129	HBIN042670	rutin	Flavonoid	INS	Jinyinhua
1130	HBIN042670	rutin	Flavonoid	CASP3	Jinyinhua
1131	HBIN042670	rutin	Flavonoid	POR	Jinyinhua
1132	HBIN042670	rutin	Flavonoid	SOD1	Jinyinhua
1133	HBIN042670	rutin	Flavonoid	CXCL1	Jinyinhua
1134	HBIN042670	rutin	Flavonoid	TNF	Jinyinhua
1135	HBIN042670	rutin	Flavonoid	MPO	Jinyinhua
1136	HBIN042670	rutin	Flavonoid	ITGB2	Jinyinhua
1137	HBIN042670	rutin	Flavonoid	TBXA2R	Jinyinhua
1138	HBIN042670	rutin	Flavonoid	IFNG	Jinyinhua
1139	HBIN042670	rutin	Flavonoid	DIO1	Qinghao
1140	HBIN042670	rutin	Flavonoid	HAS2	Qinghao
1141	HBIN042670	rutin	Flavonoid	STAT4	Qinghao
1142	HBIN042670	rutin	Flavonoid	CXCL8	Qinghao
1143	HBIN042670	rutin	Flavonoid	IL1B	Qinghao
1144	HBIN042670	rutin	Flavonoid	HMGCR	Qinghao
1145	HBIN042670	rutin	Flavonoid	TBXAS1	Qinghao
1146	HBIN042670	rutin	Flavonoid	IL6	Qinghao
1147	HBIN042670	rutin	Flavonoid	SIRT1	Qinghao
1148	HBIN042670	rutin	Flavonoid	TFAM	Qinghao
1149	HBIN042670	rutin	Flavonoid	ALOX5	Qinghao
1150	HBIN042670	rutin	Flavonoid	FCER2	Qinghao
1151	HBIN042670	rutin	Flavonoid	NOS2	Qinghao
1152	HBIN042670	rutin	Flavonoid	S100A8	Qinghao
1153	HBIN042670	rutin	Flavonoid	UCP1	Qinghao
1154	HBIN042670	rutin	Flavonoid	C5AR1	Qinghao
1155	HBIN042670	rutin	Flavonoid	PRKCB	Qinghao
1156	HBIN042670	rutin	Flavonoid	RELA	Qinghao
1157	HBIN042670	rutin	Flavonoid	PPARGC1A	Qinghao
1158	HBIN042670	rutin	Flavonoid	CAT	Qinghao
1159	HBIN042670	rutin	Flavonoid	GSTP1	Qinghao
1160	HBIN042670	rutin	Flavonoid	INS	Qinghao
1161	HBIN042670	rutin	Flavonoid	CASP3	Qinghao
1162	HBIN042670	rutin	Flavonoid	POR	Qinghao
1163	HBIN042670	rutin	Flavonoid	SOD1	Qinghao
1164	HBIN042670	rutin	Flavonoid	CXCL1	Qinghao
1165	HBIN042670	rutin	Flavonoid	TNF	Qinghao
1166	HBIN042670	rutin	Flavonoid	MPO	Qinghao
1167	HBIN042670	rutin	Flavonoid	ITGB2	Qinghao
1168	HBIN042670	rutin	Flavonoid	TBXA2R	Qinghao
1169	HBIN042670	rutin	Flavonoid	IFNG	Qinghao
1170	HBIN042670	rutin	Flavonoid	DIO1	Huangqin
1171	HBIN042670	rutin	Flavonoid	HAS2	Huangqin
1172	HBIN042670	rutin	Flavonoid	STAT4	Huangqin
1173	HBIN042670	rutin	Flavonoid	CXCL8	Huangqin
1174	HBIN042670	rutin	Flavonoid	IL1B	Huangqin
1175	HBIN042670	rutin	Flavonoid	HMGCR	Huangqin
1176	HBIN042670	rutin	Flavonoid	TBXAS1	Huangqin
1177	HBIN042670	rutin	Flavonoid	IL6	Huangqin
1178	HBIN042670	rutin	Flavonoid	SIRT1	Huangqin
1179	HBIN042670	rutin	Flavonoid	TFAM	Huangqin
1180	HBIN042670	rutin	Flavonoid	ALOX5	Huangqin
1181	HBIN042670	rutin	Flavonoid	FCER2	Huangqin
1182	HBIN042670	rutin	Flavonoid	NOS2	Huangqin
1183	HBIN042670	rutin	Flavonoid	S100A8	Huangqin
1184	HBIN042670	rutin	Flavonoid	UCP1	Huangqin
1185	HBIN042670	rutin	Flavonoid	C5AR1	Huangqin
1186	HBIN042670	rutin	Flavonoid	PRKCB	Huangqin
1187	HBIN042670	rutin	Flavonoid	RELA	Huangqin
1188	HBIN042670	rutin	Flavonoid	PPARGC1A	Huangqin
1189	HBIN042670	rutin	Flavonoid	CAT	Huangqin
1190	HBIN042670	rutin	Flavonoid	GSTP1	Huangqin
1191	HBIN042670	rutin	Flavonoid	INS	Huangqin
1192	HBIN042670	rutin	Flavonoid	CASP3	Huangqin
1193	HBIN042670	rutin	Flavonoid	POR	Huangqin
1194	HBIN042670	rutin	Flavonoid	SOD1	Huangqin
1195	HBIN042670	rutin	Flavonoid	CXCL1	Huangqin
1196	HBIN042670	rutin	Flavonoid	TNF	Huangqin
1197	HBIN042670	rutin	Flavonoid	MPO	Huangqin
1198	HBIN042670	rutin	Flavonoid	ITGB2	Huangqin
1199	HBIN042670	rutin	Flavonoid	TBXA2R	Huangqin
1200	HBIN042670	rutin	Flavonoid	IFNG	Huangqin
1201	HBIN042670	rutin	Flavonoid	DIO1	Lianqiao
1202	HBIN042670	rutin	Flavonoid	HAS2	Lianqiao
1203	HBIN042670	rutin	Flavonoid	STAT4	Lianqiao
1204	HBIN042670	rutin	Flavonoid	CXCL8	Lianqiao
1205	HBIN042670	rutin	Flavonoid	IL1B	Lianqiao
1206	HBIN042670	rutin	Flavonoid	HMGCR	Lianqiao
1207	HBIN042670	rutin	Flavonoid	TBXAS1	Lianqiao
1208	HBIN042670	rutin	Flavonoid	IL6	Lianqiao
1209	HBIN042670	rutin	Flavonoid	SIRT1	Lianqiao
1210	HBIN042670	rutin	Flavonoid	TFAM	Lianqiao
1211	HBIN042670	rutin	Flavonoid	ALOX5	Lianqiao
1212	HBIN042670	rutin	Flavonoid	FCER2	Lianqiao
1213	HBIN042670	rutin	Flavonoid	NOS2	Lianqiao
1214	HBIN042670	rutin	Flavonoid	S100A8	Lianqiao
1215	HBIN042670	rutin	Flavonoid	UCP1	Lianqiao
1216	HBIN042670	rutin	Flavonoid	C5AR1	Lianqiao
1217	HBIN042670	rutin	Flavonoid	PRKCB	Lianqiao
1218	HBIN042670	rutin	Flavonoid	RELA	Lianqiao
1219	HBIN042670	rutin	Flavonoid	PPARGC1A	Lianqiao
1220	HBIN042670	rutin	Flavonoid	CAT	Lianqiao
1221	HBIN042670	rutin	Flavonoid	GSTP1	Lianqiao
1222	HBIN042670	rutin	Flavonoid	INS	Lianqiao
1223	HBIN042670	rutin	Flavonoid	CASP3	Lianqiao
1224	HBIN042670	rutin	Flavonoid	POR	Lianqiao
1225	HBIN042670	rutin	Flavonoid	SOD1	Lianqiao
1226	HBIN042670	rutin	Flavonoid	CXCL1	Lianqiao
1227	HBIN042670	rutin	Flavonoid	TNF	Lianqiao
1228	HBIN042670	rutin	Flavonoid	MPO	Lianqiao
1229	HBIN042670	rutin	Flavonoid	ITGB2	Lianqiao
1230	HBIN042670	rutin	Flavonoid	TBXA2R	Lianqiao
1231	HBIN042670	rutin	Flavonoid	IFNG	Lianqiao
1232	HBIN033867	luteoloside	Flavonoid	HMOX1	Huangqin
1233	HBIN033867	luteoloside	Flavonoid	SLC5A2	Huangqin
1234	HBIN033867	luteoloside	Flavonoid	NDOR1	Huangqin
1235	HBIN033867	luteoloside	Flavonoid	NOS3	Huangqin
1236	HBIN033867	luteoloside	Flavonoid	POR	Huangqin
1237	HBIN033867	luteoloside	Flavonoid	NOS2	Huangqin
1238	HBIN033867	luteoloside	Flavonoid	NOS1	Huangqin
1239	HBIN033867	luteoloside	Flavonoid	MTRR	Huangqin
1240	HBIN033867	luteoloside	Flavonoid	TYW1	Huangqin
1241	HBIN031102	isoquercitrin	Flavonoid	CA2	Jinyinhua
1242	HBIN031102	isoquercitrin	Flavonoid	MRP2	Jinyinhua
1243	HBIN031102	isoquercitrin	Flavonoid	CAR	Jinyinhua
1244	HBIN007333	3,4-dicaffeoylquinic acid	Caffeoylquinic acid	AKR1B10	Jinyinhua
1245	HBIN007333	3,4-dicaffeoylquinic acid	Caffeoylquinic acid	AKR1B1	Jinyinhua
1246	HBIN007333	3,4-dicaffeoylquinic acid	Caffeoylquinic acid	AKR1B10	Niubangzi
1247	HBIN007333	3,4-dicaffeoylquinic acid	Caffeoylquinic acid	AKR1B1	Niubangzi
1248	HBIN007333	3,4-dicaffeoylquinic acid	Caffeoylquinic acid	AKR1B10	Lianqiao
1249	HBIN007333	3,4-dicaffeoylquinic acid	Caffeoylquinic acid	AKR1B1	Lianqiao
1250	HBIN043533	scutellarin	Flavonoid	FN1	Huangqin
1251	HBIN043533	scutellarin	Flavonoid	MAPK3	Huangqin
1252	HBIN043533	scutellarin	Flavonoid	CA2	Huangqin
1253	HBIN043533	scutellarin	Flavonoid	TNF	Huangqin
1254	HBIN043533	scutellarin	Flavonoid	PIM1	Huangqin
1255	HBIN043533	scutellarin	Flavonoid	MAPK14	Huangqin
1256	HBIN043533	scutellarin	Flavonoid	MAPK1	Huangqin
1257	HBIN043533	scutellarin	Flavonoid	RBPJ	Huangqin
1258	HBIN043533	scutellarin	Flavonoid	CCL2	Huangqin
1259	HBIN043533	scutellarin	Flavonoid	CRK	Huangqin
1260	HBIN043533	scutellarin	Flavonoid	AGT	Huangqin
1261	HBIN043533	scutellarin	Flavonoid	CASP3	Huangqin
1262	HBIN043533	scutellarin	Flavonoid	BCL2L1	Huangqin
1263	HBIN043533	scutellarin	Flavonoid	HES1	Huangqin
1264	HBIN043533	scutellarin	Flavonoid	TGFB1	Huangqin
1265	HBIN043533	scutellarin	Flavonoid	PRKCG	Huangqin
1266	HBIN043533	scutellarin	Flavonoid	AHSA1	Huangqin
1267	HBIN043533	scutellarin	Flavonoid	NOTCH1	Huangqin
1268	HBIN042438	rosmarinic acid	Phenolic acid	PRKAA2	Mixed
1269	HBIN042438	rosmarinic acid	Phenolic acid	ESR1	Mixed
1270	HBIN042438	rosmarinic acid	Phenolic acid	IL5	Mixed
1271	HBIN042438	rosmarinic acid	Phenolic acid	SMAD3	Mixed
1272	HBIN042438	rosmarinic acid	Phenolic acid	IDO1	Mixed
1273	HBIN042438	rosmarinic acid	Phenolic acid	STAT1	Mixed
1274	HBIN042438	rosmarinic acid	Phenolic acid	EIF6	Mixed
1275	HBIN042438	rosmarinic acid	Phenolic acid	CCND3	Mixed
1276	HBIN042438	rosmarinic acid	Phenolic acid	PINK1	Mixed
1277	HBIN042438	rosmarinic acid	Phenolic acid	AKT1	Mixed
1278	HBIN042438	rosmarinic acid	Phenolic acid	MAPK3	Mixed
1279	HBIN042438	rosmarinic acid	Phenolic acid	NFE2L2	Mixed
1280	HBIN042438	rosmarinic acid	Phenolic acid	C5	Mixed
1281	HBIN042438	rosmarinic acid	Phenolic acid	MAPK1	Mixed
1282	HBIN042438	rosmarinic acid	Phenolic acid	AR	Mixed
1283	HBIN042438	rosmarinic acid	Phenolic acid	CD86	Mixed
1284	HBIN042438	rosmarinic acid	Phenolic acid	NFATC3	Mixed
1285	HBIN042438	rosmarinic acid	Phenolic acid	MGAM	Mixed
1286	HBIN042438	rosmarinic acid	Phenolic acid	IGHG1	Mixed
1287	HBIN042438	rosmarinic acid	Phenolic acid	CCL11	Mixed
1288	HBIN042438	rosmarinic acid	Phenolic acid	IL2	Mixed
1289	HBIN042438	rosmarinic acid	Phenolic acid	IKBKB	Mixed
1290	HBIN042438	rosmarinic acid	Phenolic acid	RELA	Mixed
1291	HBIN042438	rosmarinic acid	Phenolic acid	CDKN1A	Mixed
1292	HBIN042438	rosmarinic acid	Phenolic acid	F2	Mixed
1293	HBIN042438	rosmarinic acid	Phenolic acid	CDK2	Mixed
1294	HBIN042438	rosmarinic acid	Phenolic acid	C3	Mixed
1295	HBIN042438	rosmarinic acid	Phenolic acid	CA2	Mixed
1296	HBIN042438	rosmarinic acid	Phenolic acid	GSK3B	Mixed
1297	HBIN042438	rosmarinic acid	Phenolic acid	IL4	Mixed
1298	HBIN042438	rosmarinic acid	Phenolic acid	CD247	Mixed
1299	HBIN042438	rosmarinic acid	Phenolic acid	SNCA	Mixed
1300	HBIN042438	rosmarinic acid	Phenolic acid	CCR3	Mixed
1301	HBIN042438	rosmarinic acid	Phenolic acid	CD80	Mixed
1302	HBIN042438	rosmarinic acid	Phenolic acid	CASP3	Mixed
1303	HBIN042438	rosmarinic acid	Phenolic acid	CCL3	Mixed
1304	HBIN042438	rosmarinic acid	Phenolic acid	PRSS1	Mixed
1305	HBIN042438	rosmarinic acid	Phenolic acid	HMOX1	Mixed
1306	HBIN042438	rosmarinic acid	Phenolic acid	DPP4	Mixed
1307	HBIN042438	rosmarinic acid	Phenolic acid	FGFR1	Mixed
1308	HBIN042438	rosmarinic acid	Phenolic acid	TNF	Mixed
1309	HBIN042438	rosmarinic acid	Phenolic acid	MAPK14	Mixed
1310	HBIN042438	rosmarinic acid	Phenolic acid	HMGB1	Mixed
1311	HBIN042438	rosmarinic acid	Phenolic acid	CCL2	Mixed
1312	HBIN042438	rosmarinic acid	Phenolic acid	PTGS2	Mixed
1313	HBIN042438	rosmarinic acid	Phenolic acid	FYN	Mixed
1314	HBIN042438	rosmarinic acid	Phenolic acid	PRKAA1	Mixed
1315	HBIN042438	rosmarinic acid	Phenolic acid	PPARG	Mixed
1316	HBIN030583	isochlorogenic acid c	Caffeoylquinic acid	PRSS1	Jinyinhua
1317	HBIN030583	isochlorogenic acid c	Caffeoylquinic acid	PRSS1	Niubangzi
1318	HBIN030583	isochlorogenic acid c	Caffeoylquinic acid	PRSS1	Lianqiao
1319	HBIN039065	peimisine	Alkaloid	NR3C1	Zhebeimu
1320	HBIN039065	peimisine	Alkaloid	ESR1	Zhebeimu
1321	HBIN039065	peimisine	Alkaloid	AR	Zhebeimu
1322	HBIN039065	peimisine	Alkaloid	NR3C2	Zhebeimu
1323	HBIN044393	sophoricoside	Flavonoid	F7	Mixed
1324	HBIN044393	sophoricoside	Flavonoid	CA2	Mixed
1325	HBIN044393	sophoricoside	Flavonoid	CCNA2	Mixed
1326	HBIN044393	sophoricoside	Flavonoid	PIM1	Mixed
1327	HBIN044393	sophoricoside	Flavonoid	AR	Mixed
1328	HBIN044393	sophoricoside	Flavonoid	PTGS2	Mixed
1329	HBIN024193	diosmin	Flavonoid	ESR1	Mixed
1330	HBIN024193	diosmin	Flavonoid	CHEK1	Mixed
1331	HBIN024193	diosmin	Flavonoid	NFKB1	Mixed
1332	HBIN024193	diosmin	Flavonoid	PTGS1	Mixed
1333	HBIN024193	diosmin	Flavonoid	IL1B	Mixed
1334	HBIN024193	diosmin	Flavonoid	DPEP1	Mixed
1335	HBIN024193	diosmin	Flavonoid	NCOA2	Mixed
1336	HBIN024193	diosmin	Flavonoid	IL6	Mixed
1337	HBIN024193	diosmin	Flavonoid	CCNA2	Mixed
1338	HBIN024193	diosmin	Flavonoid	AR	Mixed
1339	HBIN024193	diosmin	Flavonoid	ESR2	Mixed
1340	HBIN024193	diosmin	Flavonoid	NOS2	Mixed
1341	HBIN024193	diosmin	Flavonoid	IL2	Mixed
1342	HBIN024193	diosmin	Flavonoid	CDK2	Mixed
1343	HBIN024193	diosmin	Flavonoid	CA2	Mixed
1344	HBIN024193	diosmin	Flavonoid	GSK3B	Mixed
1345	HBIN024193	diosmin	Flavonoid	PIM1	Mixed
1346	HBIN024193	diosmin	Flavonoid	IL17A	Mixed
1347	HBIN024193	diosmin	Flavonoid	PRSS1	Mixed
1348	HBIN024193	diosmin	Flavonoid	NCOA1	Mixed
1349	HBIN024193	diosmin	Flavonoid	DPP4	Mixed
1350	HBIN024193	diosmin	Flavonoid	TNF	Mixed
1351	HBIN024193	diosmin	Flavonoid	MAPK14	Mixed
1352	HBIN024193	diosmin	Flavonoid	PTGS2	Mixed
1353	HBIN024193	diosmin	Flavonoid	PPARG	Mixed
1354	HBIN017212	astragalin	Flavonoid	ESR1	Jinyinhua
1355	HBIN017212	astragalin	Flavonoid	CHEK1	Jinyinhua
1356	HBIN017212	astragalin	Flavonoid	PTGS1	Jinyinhua
1357	HBIN017212	astragalin	Flavonoid	NCOA2	Jinyinhua
1358	HBIN017212	astragalin	Flavonoid	KCNH2	Jinyinhua
1359	HBIN017212	astragalin	Flavonoid	CCNA2	Jinyinhua
1360	HBIN017212	astragalin	Flavonoid	AR	Jinyinhua
1361	HBIN017212	astragalin	Flavonoid	ESR2	Jinyinhua
1362	HBIN017212	astragalin	Flavonoid	NOS2	Jinyinhua
1363	HBIN017212	astragalin	Flavonoid	PPARG	Jinyinhua
1364	HBIN017212	astragalin	Flavonoid	CDK2	Jinyinhua
1365	HBIN017212	astragalin	Flavonoid	F7	Jinyinhua
1366	HBIN017212	astragalin	Flavonoid	CA2	Jinyinhua
1367	HBIN017212	astragalin	Flavonoid	GSK3B	Jinyinhua
1368	HBIN017212	astragalin	Flavonoid	PIM1	Jinyinhua
1369	HBIN017212	astragalin	Flavonoid	KDR	Jinyinhua
1370	HBIN017212	astragalin	Flavonoid	PRSS1	Jinyinhua
1371	HBIN017212	astragalin	Flavonoid	MAPK14	Jinyinhua
1372	HBIN017212	astragalin	Flavonoid	PTGS2	Jinyinhua
1373	HBIN017212	astragalin	Flavonoid	DPP4	Jinyinhua
1374	HBIN017212	astragalin	Flavonoid	ESR1	Huangqin
1375	HBIN017212	astragalin	Flavonoid	CHEK1	Huangqin
1376	HBIN017212	astragalin	Flavonoid	PTGS1	Huangqin
1377	HBIN017212	astragalin	Flavonoid	NCOA2	Huangqin
1378	HBIN017212	astragalin	Flavonoid	KCNH2	Huangqin
1379	HBIN017212	astragalin	Flavonoid	CCNA2	Huangqin
1380	HBIN017212	astragalin	Flavonoid	AR	Huangqin
1381	HBIN017212	astragalin	Flavonoid	ESR2	Huangqin
1382	HBIN017212	astragalin	Flavonoid	NOS2	Huangqin
1383	HBIN017212	astragalin	Flavonoid	PPARG	Huangqin
1384	HBIN017212	astragalin	Flavonoid	CDK2	Huangqin
1385	HBIN017212	astragalin	Flavonoid	F7	Huangqin
1386	HBIN017212	astragalin	Flavonoid	CA2	Huangqin
1387	HBIN017212	astragalin	Flavonoid	GSK3B	Huangqin
1388	HBIN017212	astragalin	Flavonoid	PIM1	Huangqin
1389	HBIN017212	astragalin	Flavonoid	KDR	Huangqin
1390	HBIN017212	astragalin	Flavonoid	PRSS1	Huangqin
1391	HBIN017212	astragalin	Flavonoid	MAPK14	Huangqin
1392	HBIN017212	astragalin	Flavonoid	PTGS2	Huangqin
1393	HBIN017212	astragalin	Flavonoid	DPP4	Huangqin
1394	HBIN017212	astragalin	Flavonoid	ESR1	Lianqiao
1395	HBIN017212	astragalin	Flavonoid	CHEK1	Lianqiao
1396	HBIN017212	astragalin	Flavonoid	PTGS1	Lianqiao
1397	HBIN017212	astragalin	Flavonoid	NCOA2	Lianqiao
1398	HBIN017212	astragalin	Flavonoid	KCNH2	Lianqiao
1399	HBIN017212	astragalin	Flavonoid	CCNA2	Lianqiao
1400	HBIN017212	astragalin	Flavonoid	AR	Lianqiao
1401	HBIN017212	astragalin	Flavonoid	ESR2	Lianqiao
1402	HBIN017212	astragalin	Flavonoid	NOS2	Lianqiao
1403	HBIN017212	astragalin	Flavonoid	PPARG	Lianqiao
1404	HBIN017212	astragalin	Flavonoid	CDK2	Lianqiao
1405	HBIN017212	astragalin	Flavonoid	F7	Lianqiao
1406	HBIN017212	astragalin	Flavonoid	CA2	Lianqiao
1407	HBIN017212	astragalin	Flavonoid	GSK3B	Lianqiao
1408	HBIN017212	astragalin	Flavonoid	PIM1	Lianqiao
1409	HBIN017212	astragalin	Flavonoid	KDR	Lianqiao
1410	HBIN017212	astragalin	Flavonoid	PRSS1	Lianqiao
1411	HBIN017212	astragalin	Flavonoid	MAPK14	Lianqiao
1412	HBIN017212	astragalin	Flavonoid	PTGS2	Lianqiao
1413	HBIN017212	astragalin	Flavonoid	DPP4	Lianqiao
1414	HBIN043527	scutellarein	Flavonoid	ESR1	Huangqin
1415	HBIN043527	scutellarein	Flavonoid	PTGS1	Huangqin
1416	HBIN043527	scutellarein	Flavonoid	UGT1A3	Huangqin
1417	HBIN043527	scutellarein	Flavonoid	NCOA2	Huangqin
1418	HBIN043527	scutellarein	Flavonoid	CCNA2	Huangqin
1419	HBIN043527	scutellarein	Flavonoid	AR	Huangqin
1420	HBIN043527	scutellarein	Flavonoid	ESR2	Huangqin
1421	HBIN043527	scutellarein	Flavonoid	NOS2	Huangqin
1422	HBIN043527	scutellarein	Flavonoid	CDK2	Huangqin
1423	HBIN043527	scutellarein	Flavonoid	DYM	Huangqin
1424	HBIN043527	scutellarein	Flavonoid	CA2	Huangqin
1425	HBIN043527	scutellarein	Flavonoid	GSK3B	Huangqin
1426	HBIN043527	scutellarein	Flavonoid	UGT1A5	Huangqin
1427	HBIN043527	scutellarein	Flavonoid	PIM1	Huangqin
1428	HBIN043527	scutellarein	Flavonoid	PRSS1	Huangqin
1429	HBIN043527	scutellarein	Flavonoid	CYP1A1	Huangqin
1430	HBIN043527	scutellarein	Flavonoid	VEGFA	Huangqin
1431	HBIN043527	scutellarein	Flavonoid	MAPK14	Huangqin
1432	HBIN043527	scutellarein	Flavonoid	PTGS2	Huangqin
1433	HBIN043527	scutellarein	Flavonoid	PPARG	Huangqin
1434	HBIN022577	daidzein	Flavonoid	ESR1	Mixed
1435	HBIN022577	daidzein	Flavonoid	JUN	Mixed
1436	HBIN022577	daidzein	Flavonoid	TP53	Mixed
1437	HBIN022577	daidzein	Flavonoid	PTGS1	Mixed
1438	HBIN022577	daidzein	Flavonoid	STAT1	Mixed
1439	HBIN022577	daidzein	Flavonoid	APOB	Mixed
1440	HBIN022577	daidzein	Flavonoid	HSD3B2	Mixed
1441	HBIN022577	daidzein	Flavonoid	RBM45	Mixed
1442	HBIN022577	daidzein	Flavonoid	AHR	Mixed
1443	HBIN022577	daidzein	Flavonoid	HSD3B1	Mixed
1444	HBIN022577	daidzein	Flavonoid	PDE3A	Mixed
1445	HBIN022577	daidzein	Flavonoid	GH1	Mixed
1446	HBIN022577	daidzein	Flavonoid	P4HB	Mixed
1447	HBIN022577	daidzein	Flavonoid	RELA	Mixed
1448	HBIN022577	daidzein	Flavonoid	IGF1	Mixed
1449	HBIN022577	daidzein	Flavonoid	MTTP	Mixed
1450	HBIN022577	daidzein	Flavonoid	EP300	Mixed
1451	HBIN022577	daidzein	Flavonoid	SCD	Mixed
1452	HBIN022577	daidzein	Flavonoid	PRSS1	Mixed
1453	HBIN022577	daidzein	Flavonoid	CPT1A	Mixed
1454	HBIN022577	daidzein	Flavonoid	TNF	Mixed
1455	HBIN022577	daidzein	Flavonoid	MAPK14	Mixed
1456	HBIN022577	daidzein	Flavonoid	PTGS2	Mixed
1457	HBIN022577	daidzein	Flavonoid	CAV1	Mixed
1458	HBIN022577	daidzein	Flavonoid	MAPK1	Mixed
1459	HBIN022577	daidzein	Flavonoid	BARD1	Mixed
1460	HBIN022577	daidzein	Flavonoid	MKI67	Mixed
1461	HBIN022577	daidzein	Flavonoid	CYP21A2	Mixed
1462	HBIN022577	daidzein	Flavonoid	CDK2	Mixed
1463	HBIN022577	daidzein	Flavonoid	SOD2	Mixed
1464	HBIN022577	daidzein	Flavonoid	BAX	Mixed
1465	HBIN022577	daidzein	Flavonoid	CASP3	Mixed
1466	HBIN022577	daidzein	Flavonoid	BAP1	Mixed
1467	HBIN022577	daidzein	Flavonoid	ABCA1	Mixed
1468	HBIN022577	daidzein	Flavonoid	IGF1R	Mixed
1469	HBIN022577	daidzein	Flavonoid	RAD51	Mixed
1470	HBIN022577	daidzein	Flavonoid	RXRA	Mixed
1471	HBIN022577	daidzein	Flavonoid	FOS	Mixed
1472	HBIN022577	daidzein	Flavonoid	GABBR1	Mixed
1473	HBIN022577	daidzein	Flavonoid	ABCG1	Mixed
1474	HBIN022577	daidzein	Flavonoid	ECE1	Mixed
1475	HBIN022577	daidzein	Flavonoid	ADRB2	Mixed
1476	HBIN022577	daidzein	Flavonoid	SRC	Mixed
1477	HBIN022577	daidzein	Flavonoid	TRPM2	Mixed
1478	HBIN022577	daidzein	Flavonoid	CCNA2	Mixed
1479	HBIN022577	daidzein	Flavonoid	FCER2	Mixed
1480	HBIN022577	daidzein	Flavonoid	ESR2	Mixed
1481	HBIN022577	daidzein	Flavonoid	APOE	Mixed
1482	HBIN022577	daidzein	Flavonoid	B4GALT4	Mixed
1483	HBIN022577	daidzein	Flavonoid	SLC6A20	Mixed
1484	HBIN022577	daidzein	Flavonoid	CDKN1A	Mixed
1485	HBIN022577	daidzein	Flavonoid	CAT	Mixed
1486	HBIN022577	daidzein	Flavonoid	CA2	Mixed
1487	HBIN022577	daidzein	Flavonoid	CD5L	Mixed
1488	HBIN022577	daidzein	Flavonoid	ICAM1	Mixed
1489	HBIN022577	daidzein	Flavonoid	TGFB1I1	Mixed
1490	HBIN022577	daidzein	Flavonoid	CALM3	Mixed
1491	HBIN022577	daidzein	Flavonoid	VEGFA	Mixed
1492	HBIN022577	daidzein	Flavonoid	ATP5F1B	Mixed
1493	HBIN022577	daidzein	Flavonoid	LDLR	Mixed
1494	HBIN022577	daidzein	Flavonoid	TFF1	Mixed
1495	HBIN022577	daidzein	Flavonoid	PPARG	Mixed
1496	HBIN022577	daidzein	Flavonoid	GADD45A	Mixed
1497	HBIN022577	daidzein	Flavonoid	CHEK1	Mixed
1498	HBIN022577	daidzein	Flavonoid	PRKCD	Mixed
1499	HBIN022577	daidzein	Flavonoid	PPARGC1B	Mixed
1500	HBIN022577	daidzein	Flavonoid	CYP3A4	Mixed
1501	HBIN022577	daidzein	Flavonoid	EIF6	Mixed
1502	HBIN022577	daidzein	Flavonoid	IL6	Mixed
1503	HBIN022577	daidzein	Flavonoid	NOS2	Mixed
1504	HBIN022577	daidzein	Flavonoid	MT2A	Mixed
1505	HBIN022577	daidzein	Flavonoid	RHOA	Mixed
1506	HBIN022577	daidzein	Flavonoid	IL4	Mixed
1507	HBIN022577	daidzein	Flavonoid	VCAM1	Mixed
1508	HBIN022577	daidzein	Flavonoid	PIM1	Mixed
1509	HBIN022577	daidzein	Flavonoid	NOS3	Mixed
1510	HBIN022577	daidzein	Flavonoid	GHR	Mixed
1511	HBIN022577	daidzein	Flavonoid	LARS1	Mixed
1512	HBIN041495	quercetin	Flavonoid	COL3A1	Mahuang
1513	HBIN041495	quercetin	Flavonoid	ESR1	Mahuang
1514	HBIN041495	quercetin	Flavonoid	JUN	Mahuang
1515	HBIN041495	quercetin	Flavonoid	SULT1E1	Mahuang
1516	HBIN041495	quercetin	Flavonoid	TP53	Mahuang
1517	HBIN041495	quercetin	Flavonoid	GABRA1	Mahuang
1518	HBIN041495	quercetin	Flavonoid	PTGS1	Mahuang
1519	HBIN041495	quercetin	Flavonoid	STAT1	Mahuang
1520	HBIN041495	quercetin	Flavonoid	CXCL10	Mahuang
1521	HBIN041495	quercetin	Flavonoid	AKT1	Mahuang
1522	HBIN041495	quercetin	Flavonoid	AHR	Mahuang
1523	HBIN041495	quercetin	Flavonoid	PLAU	Mahuang
1524	HBIN041495	quercetin	Flavonoid	DUOX2	Mahuang
1525	HBIN041495	quercetin	Flavonoid	TOP1	Mahuang
1526	HBIN041495	quercetin	Flavonoid	RELA	Mahuang
1527	HBIN041495	quercetin	Flavonoid	RUNX1T1	Mahuang
1528	HBIN041495	quercetin	Flavonoid	E2F2	Mahuang
1529	HBIN041495	quercetin	Flavonoid	PON1	Mahuang
1530	HBIN041495	quercetin	Flavonoid	ABCG2	Mahuang
1531	HBIN041495	quercetin	Flavonoid	POR	Mahuang
1532	HBIN041495	quercetin	Flavonoid	SOD3	Mahuang
1533	HBIN041495	quercetin	Flavonoid	BCL2L1	Mahuang
1534	HBIN041495	quercetin	Flavonoid	HSPB1	Mahuang
1535	HBIN041495	quercetin	Flavonoid	PRSS1	Mahuang
1536	HBIN041495	quercetin	Flavonoid	RUNX2	Mahuang
1537	HBIN041495	quercetin	Flavonoid	DCAF5	Mahuang
1538	HBIN041495	quercetin	Flavonoid	ACHE	Mahuang
1539	HBIN041495	quercetin	Flavonoid	HIF1A	Mahuang
1540	HBIN041495	quercetin	Flavonoid	SOD1	Mahuang
1541	HBIN041495	quercetin	Flavonoid	MMP9	Mahuang
1542	HBIN041495	quercetin	Flavonoid	ACACA	Mahuang
1543	HBIN041495	quercetin	Flavonoid	TNF	Mahuang
1544	HBIN041495	quercetin	Flavonoid	MAPK14	Mahuang
1545	HBIN041495	quercetin	Flavonoid	CCL2	Mahuang
1546	HBIN041495	quercetin	Flavonoid	PTGS2	Mahuang
1547	HBIN041495	quercetin	Flavonoid	ACAA2	Mahuang
1548	HBIN041495	quercetin	Flavonoid	MMP2	Mahuang
1549	HBIN041495	quercetin	Flavonoid	GJA1	Mahuang
1550	HBIN041495	quercetin	Flavonoid	CAV1	Mahuang
1551	HBIN041495	quercetin	Flavonoid	NPEPPS	Mahuang
1552	HBIN041495	quercetin	Flavonoid	PPARD	Mahuang
1553	HBIN041495	quercetin	Flavonoid	NR1I3	Mahuang
1554	HBIN041495	quercetin	Flavonoid	CXCL11	Mahuang
1555	HBIN041495	quercetin	Flavonoid	HSPA5	Mahuang
1556	HBIN041495	quercetin	Flavonoid	TGFB1	Mahuang
1557	HBIN041495	quercetin	Flavonoid	CTSD	Mahuang
1558	HBIN041495	quercetin	Flavonoid	CRP	Mahuang
1559	HBIN041495	quercetin	Flavonoid	MAPK3	Mahuang
1560	HBIN041495	quercetin	Flavonoid	GSTM1	Mahuang
1561	HBIN041495	quercetin	Flavonoid	MAPK1	Mahuang
1562	HBIN041495	quercetin	Flavonoid	F3	Mahuang
1563	HBIN041495	quercetin	Flavonoid	CHEK2	Mahuang
1564	HBIN041495	quercetin	Flavonoid	IRF1	Mahuang
1565	HBIN041495	quercetin	Flavonoid	CDK2	Mahuang
1566	HBIN041495	quercetin	Flavonoid	AHSA1	Mahuang
1567	HBIN041495	quercetin	Flavonoid	HK2	Mahuang
1568	HBIN041495	quercetin	Flavonoid	PCOLCE	Mahuang
1569	HBIN041495	quercetin	Flavonoid	THBD	Mahuang
1570	HBIN041495	quercetin	Flavonoid	HERC5	Mahuang
1571	HBIN041495	quercetin	Flavonoid	CLDN4	Mahuang
1572	HBIN041495	quercetin	Flavonoid	PLAT	Mahuang
1573	HBIN041495	quercetin	Flavonoid	GSK3B	Mahuang
1574	HBIN041495	quercetin	Flavonoid	GSTP1	Mahuang
1575	HBIN041495	quercetin	Flavonoid	NKX3-1	Mahuang
1576	HBIN041495	quercetin	Flavonoid	SLC2A4	Mahuang
1577	HBIN041495	quercetin	Flavonoid	F7	Mahuang
1578	HBIN041495	quercetin	Flavonoid	BAX	Mahuang
1579	HBIN041495	quercetin	Flavonoid	ELK1	Mahuang
1580	HBIN041495	quercetin	Flavonoid	MMP1	Mahuang
1581	HBIN041495	quercetin	Flavonoid	CASP3	Mahuang
1582	HBIN041495	quercetin	Flavonoid	SELE	Mahuang
1583	HBIN041495	quercetin	Flavonoid	HSF1	Mahuang
1584	HBIN041495	quercetin	Flavonoid	NCF1	Mahuang
1585	HBIN041495	quercetin	Flavonoid	HMOX1	Mahuang
1586	HBIN041495	quercetin	Flavonoid	SERPINE1	Mahuang
1587	HBIN041495	quercetin	Flavonoid	CDKN2A	Mahuang
1588	HBIN041495	quercetin	Flavonoid	CCNB1	Mahuang
1589	HBIN041495	quercetin	Flavonoid	IL10	Mahuang
1590	HBIN041495	quercetin	Flavonoid	BCL2	Mahuang
1591	HBIN041495	quercetin	Flavonoid	RXRA	Mahuang
1592	HBIN041495	quercetin	Flavonoid	POLD1	Mahuang
1593	HBIN041495	quercetin	Flavonoid	DIO1	Mahuang
1594	HBIN041495	quercetin	Flavonoid	FOS	Mahuang
1595	HBIN041495	quercetin	Flavonoid	IGF2	Mahuang
1596	HBIN041495	quercetin	Flavonoid	PSMD3	Mahuang
1597	HBIN041495	quercetin	Flavonoid	ADRB2	Mahuang
1598	HBIN041495	quercetin	Flavonoid	PPARA	Mahuang
1599	HBIN041495	quercetin	Flavonoid	NCOA2	Mahuang
1600	HBIN041495	quercetin	Flavonoid	CASP9	Mahuang
1601	HBIN041495	quercetin	Flavonoid	COL1A1	Mahuang
1602	HBIN041495	quercetin	Flavonoid	NFE2L2	Mahuang
1603	HBIN041495	quercetin	Flavonoid	CCNA2	Mahuang
1604	HBIN041495	quercetin	Flavonoid	ALOX5	Mahuang
1605	HBIN041495	quercetin	Flavonoid	AR	Mahuang
1606	HBIN041495	quercetin	Flavonoid	ESR2	Mahuang
1607	HBIN041495	quercetin	Flavonoid	PTGER3	Mahuang
1608	HBIN041495	quercetin	Flavonoid	IL2	Mahuang
1609	HBIN041495	quercetin	Flavonoid	RAF1	Mahuang
1610	HBIN041495	quercetin	Flavonoid	IL1A	Mahuang
1611	HBIN041495	quercetin	Flavonoid	CDKN1A	Mahuang
1612	HBIN041495	quercetin	Flavonoid	PRKCB	Mahuang
1613	HBIN041495	quercetin	Flavonoid	CAT	Mahuang
1614	HBIN041495	quercetin	Flavonoid	MMP3	Mahuang
1615	HBIN041495	quercetin	Flavonoid	ODC1	Mahuang
1616	HBIN041495	quercetin	Flavonoid	CA2	Mahuang
1617	HBIN041495	quercetin	Flavonoid	ACP3	Mahuang
1618	HBIN041495	quercetin	Flavonoid	CXCL2	Mahuang
1619	HBIN041495	quercetin	Flavonoid	ERBB3	Mahuang
1620	HBIN041495	quercetin	Flavonoid	CCND1	Mahuang
1621	HBIN041495	quercetin	Flavonoid	ICAM1	Mahuang
1622	HBIN041495	quercetin	Flavonoid	SCN5A	Mahuang
1623	HBIN041495	quercetin	Flavonoid	CYP1A1	Mahuang
1624	HBIN041495	quercetin	Flavonoid	NR1I2	Mahuang
1625	HBIN041495	quercetin	Flavonoid	PARP1	Mahuang
1626	HBIN041495	quercetin	Flavonoid	CYP1B1	Mahuang
1627	HBIN041495	quercetin	Flavonoid	MAOB	Mahuang
1628	HBIN041495	quercetin	Flavonoid	VEGFA	Mahuang
1629	HBIN041495	quercetin	Flavonoid	MPO	Mahuang
1630	HBIN041495	quercetin	Flavonoid	RB1	Mahuang
1631	HBIN041495	quercetin	Flavonoid	EGF	Mahuang
1632	HBIN041495	quercetin	Flavonoid	NFKBIA	Mahuang
1633	HBIN041495	quercetin	Flavonoid	BIRC5	Mahuang
1634	HBIN041495	quercetin	Flavonoid	PPARG	Mahuang
1635	HBIN041495	quercetin	Flavonoid	DPP4	Mahuang
1636	HBIN041495	quercetin	Flavonoid	HAS2	Mahuang
1637	HBIN041495	quercetin	Flavonoid	ERBB2	Mahuang
1638	HBIN041495	quercetin	Flavonoid	CHEK1	Mahuang
1639	HBIN041495	quercetin	Flavonoid	CXCL8	Mahuang
1640	HBIN041495	quercetin	Flavonoid	INSR	Mahuang
1641	HBIN041495	quercetin	Flavonoid	CYP3A4	Mahuang
1642	HBIN041495	quercetin	Flavonoid	IL1B	Mahuang
1643	HBIN041495	quercetin	Flavonoid	CDK1	Mahuang
1644	HBIN041495	quercetin	Flavonoid	EIF6	Mahuang
1645	HBIN041495	quercetin	Flavonoid	DPEP1	Mahuang
1646	HBIN041495	quercetin	Flavonoid	BMP2	Mahuang
1647	HBIN041495	quercetin	Flavonoid	IL6	Mahuang
1648	HBIN041495	quercetin	Flavonoid	KCNH2	Mahuang
1649	HBIN041495	quercetin	Flavonoid	E2F1	Mahuang
1650	HBIN041495	quercetin	Flavonoid	SPP1	Mahuang
1651	HBIN041495	quercetin	Flavonoid	TOP2A	Mahuang
1652	HBIN041495	quercetin	Flavonoid	MGAM	Mahuang
1653	HBIN041495	quercetin	Flavonoid	NOS2	Mahuang
1654	HBIN041495	quercetin	Flavonoid	CHUK	Mahuang
1655	HBIN041495	quercetin	Flavonoid	PRKCA	Mahuang
1656	HBIN041495	quercetin	Flavonoid	MYC	Mahuang
1657	HBIN041495	quercetin	Flavonoid	RASA1	Mahuang
1658	HBIN041495	quercetin	Flavonoid	XDH	Mahuang
1659	HBIN041495	quercetin	Flavonoid	VCAM1	Mahuang
1660	HBIN041495	quercetin	Flavonoid	PIM1	Mahuang
1661	HBIN041495	quercetin	Flavonoid	NOS3	Mahuang
1662	HBIN041495	quercetin	Flavonoid	EGFR	Mahuang
1663	HBIN041495	quercetin	Flavonoid	CYP1A2	Mahuang
1664	HBIN041495	quercetin	Flavonoid	AKR1B1	Mahuang
1665	HBIN041495	quercetin	Flavonoid	RASSF1	Mahuang
1666	HBIN041495	quercetin	Flavonoid	IGFBP3	Mahuang
1667	HBIN041495	quercetin	Flavonoid	CD40LG	Mahuang
1668	HBIN041495	quercetin	Flavonoid	GSTM2	Mahuang
1669	HBIN041495	quercetin	Flavonoid	CASP8	Mahuang
1670	HBIN041495	quercetin	Flavonoid	PTEN	Mahuang
1671	HBIN041495	quercetin	Flavonoid	NQO1	Mahuang
1672	HBIN041495	quercetin	Flavonoid	IFNG	Mahuang
1673	HBIN041495	quercetin	Flavonoid	COL3A1	Jinyinhua
1674	HBIN041495	quercetin	Flavonoid	ESR1	Jinyinhua
1675	HBIN041495	quercetin	Flavonoid	JUN	Jinyinhua
1676	HBIN041495	quercetin	Flavonoid	SULT1E1	Jinyinhua
1677	HBIN041495	quercetin	Flavonoid	TP53	Jinyinhua
1678	HBIN041495	quercetin	Flavonoid	GABRA1	Jinyinhua
1679	HBIN041495	quercetin	Flavonoid	PTGS1	Jinyinhua
1680	HBIN041495	quercetin	Flavonoid	STAT1	Jinyinhua
1681	HBIN041495	quercetin	Flavonoid	CXCL10	Jinyinhua
1682	HBIN041495	quercetin	Flavonoid	AKT1	Jinyinhua
1683	HBIN041495	quercetin	Flavonoid	AHR	Jinyinhua
1684	HBIN041495	quercetin	Flavonoid	PLAU	Jinyinhua
1685	HBIN041495	quercetin	Flavonoid	DUOX2	Jinyinhua
1686	HBIN041495	quercetin	Flavonoid	TOP1	Jinyinhua
1687	HBIN041495	quercetin	Flavonoid	RELA	Jinyinhua
1688	HBIN041495	quercetin	Flavonoid	RUNX1T1	Jinyinhua
1689	HBIN041495	quercetin	Flavonoid	E2F2	Jinyinhua
1690	HBIN041495	quercetin	Flavonoid	PON1	Jinyinhua
1691	HBIN041495	quercetin	Flavonoid	ABCG2	Jinyinhua
1692	HBIN041495	quercetin	Flavonoid	POR	Jinyinhua
1693	HBIN041495	quercetin	Flavonoid	SOD3	Jinyinhua
1694	HBIN041495	quercetin	Flavonoid	BCL2L1	Jinyinhua
1695	HBIN041495	quercetin	Flavonoid	HSPB1	Jinyinhua
1696	HBIN041495	quercetin	Flavonoid	PRSS1	Jinyinhua
1697	HBIN041495	quercetin	Flavonoid	RUNX2	Jinyinhua
1698	HBIN041495	quercetin	Flavonoid	DCAF5	Jinyinhua
1699	HBIN041495	quercetin	Flavonoid	ACHE	Jinyinhua
1700	HBIN041495	quercetin	Flavonoid	HIF1A	Jinyinhua
1701	HBIN041495	quercetin	Flavonoid	SOD1	Jinyinhua
1702	HBIN041495	quercetin	Flavonoid	MMP9	Jinyinhua
1703	HBIN041495	quercetin	Flavonoid	ACACA	Jinyinhua
1704	HBIN041495	quercetin	Flavonoid	TNF	Jinyinhua
1705	HBIN041495	quercetin	Flavonoid	MAPK14	Jinyinhua
1706	HBIN041495	quercetin	Flavonoid	CCL2	Jinyinhua
1707	HBIN041495	quercetin	Flavonoid	PTGS2	Jinyinhua
1708	HBIN041495	quercetin	Flavonoid	ACAA2	Jinyinhua
1709	HBIN041495	quercetin	Flavonoid	MMP2	Jinyinhua
1710	HBIN041495	quercetin	Flavonoid	GJA1	Jinyinhua
1711	HBIN041495	quercetin	Flavonoid	CAV1	Jinyinhua
1712	HBIN041495	quercetin	Flavonoid	NPEPPS	Jinyinhua
1713	HBIN041495	quercetin	Flavonoid	PPARD	Jinyinhua
1714	HBIN041495	quercetin	Flavonoid	NR1I3	Jinyinhua
1715	HBIN041495	quercetin	Flavonoid	CXCL11	Jinyinhua
1716	HBIN041495	quercetin	Flavonoid	HSPA5	Jinyinhua
1717	HBIN041495	quercetin	Flavonoid	TGFB1	Jinyinhua
1718	HBIN041495	quercetin	Flavonoid	CTSD	Jinyinhua
1719	HBIN041495	quercetin	Flavonoid	CRP	Jinyinhua
1720	HBIN041495	quercetin	Flavonoid	MAPK3	Jinyinhua
1721	HBIN041495	quercetin	Flavonoid	GSTM1	Jinyinhua
1722	HBIN041495	quercetin	Flavonoid	MAPK1	Jinyinhua
1723	HBIN041495	quercetin	Flavonoid	F3	Jinyinhua
1724	HBIN041495	quercetin	Flavonoid	CHEK2	Jinyinhua
1725	HBIN041495	quercetin	Flavonoid	IRF1	Jinyinhua
1726	HBIN041495	quercetin	Flavonoid	CDK2	Jinyinhua
1727	HBIN041495	quercetin	Flavonoid	AHSA1	Jinyinhua
1728	HBIN041495	quercetin	Flavonoid	HK2	Jinyinhua
1729	HBIN041495	quercetin	Flavonoid	PCOLCE	Jinyinhua
1730	HBIN041495	quercetin	Flavonoid	THBD	Jinyinhua
1731	HBIN041495	quercetin	Flavonoid	HERC5	Jinyinhua
1732	HBIN041495	quercetin	Flavonoid	CLDN4	Jinyinhua
1733	HBIN041495	quercetin	Flavonoid	PLAT	Jinyinhua
1734	HBIN041495	quercetin	Flavonoid	GSK3B	Jinyinhua
1735	HBIN041495	quercetin	Flavonoid	GSTP1	Jinyinhua
1736	HBIN041495	quercetin	Flavonoid	NKX3-1	Jinyinhua
1737	HBIN041495	quercetin	Flavonoid	SLC2A4	Jinyinhua
1738	HBIN041495	quercetin	Flavonoid	F7	Jinyinhua
1739	HBIN041495	quercetin	Flavonoid	BAX	Jinyinhua
1740	HBIN041495	quercetin	Flavonoid	ELK1	Jinyinhua
1741	HBIN041495	quercetin	Flavonoid	MMP1	Jinyinhua
1742	HBIN041495	quercetin	Flavonoid	CASP3	Jinyinhua
1743	HBIN041495	quercetin	Flavonoid	SELE	Jinyinhua
1744	HBIN041495	quercetin	Flavonoid	HSF1	Jinyinhua
1745	HBIN041495	quercetin	Flavonoid	NCF1	Jinyinhua
1746	HBIN041495	quercetin	Flavonoid	HMOX1	Jinyinhua
1747	HBIN041495	quercetin	Flavonoid	SERPINE1	Jinyinhua
1748	HBIN041495	quercetin	Flavonoid	CDKN2A	Jinyinhua
1749	HBIN041495	quercetin	Flavonoid	CCNB1	Jinyinhua
1750	HBIN041495	quercetin	Flavonoid	IL10	Jinyinhua
1751	HBIN041495	quercetin	Flavonoid	BCL2	Jinyinhua
1752	HBIN041495	quercetin	Flavonoid	RXRA	Jinyinhua
1753	HBIN041495	quercetin	Flavonoid	POLD1	Jinyinhua
1754	HBIN041495	quercetin	Flavonoid	DIO1	Jinyinhua
1755	HBIN041495	quercetin	Flavonoid	FOS	Jinyinhua
1756	HBIN041495	quercetin	Flavonoid	IGF2	Jinyinhua
1757	HBIN041495	quercetin	Flavonoid	PSMD3	Jinyinhua
1758	HBIN041495	quercetin	Flavonoid	ADRB2	Jinyinhua
1759	HBIN041495	quercetin	Flavonoid	PPARA	Jinyinhua
1760	HBIN041495	quercetin	Flavonoid	NCOA2	Jinyinhua
1761	HBIN041495	quercetin	Flavonoid	CASP9	Jinyinhua
1762	HBIN041495	quercetin	Flavonoid	COL1A1	Jinyinhua
1763	HBIN041495	quercetin	Flavonoid	NFE2L2	Jinyinhua
1764	HBIN041495	quercetin	Flavonoid	CCNA2	Jinyinhua
1765	HBIN041495	quercetin	Flavonoid	ALOX5	Jinyinhua
1766	HBIN041495	quercetin	Flavonoid	AR	Jinyinhua
1767	HBIN041495	quercetin	Flavonoid	ESR2	Jinyinhua
1768	HBIN041495	quercetin	Flavonoid	PTGER3	Jinyinhua
1769	HBIN041495	quercetin	Flavonoid	IL2	Jinyinhua
1770	HBIN041495	quercetin	Flavonoid	RAF1	Jinyinhua
1771	HBIN041495	quercetin	Flavonoid	IL1A	Jinyinhua
1772	HBIN041495	quercetin	Flavonoid	CDKN1A	Jinyinhua
1773	HBIN041495	quercetin	Flavonoid	PRKCB	Jinyinhua
1774	HBIN041495	quercetin	Flavonoid	CAT	Jinyinhua
1775	HBIN041495	quercetin	Flavonoid	MMP3	Jinyinhua
1776	HBIN041495	quercetin	Flavonoid	ODC1	Jinyinhua
1777	HBIN041495	quercetin	Flavonoid	CA2	Jinyinhua
1778	HBIN041495	quercetin	Flavonoid	ACP3	Jinyinhua
1779	HBIN041495	quercetin	Flavonoid	CXCL2	Jinyinhua
1780	HBIN041495	quercetin	Flavonoid	ERBB3	Jinyinhua
1781	HBIN041495	quercetin	Flavonoid	CCND1	Jinyinhua
1782	HBIN041495	quercetin	Flavonoid	ICAM1	Jinyinhua
1783	HBIN041495	quercetin	Flavonoid	SCN5A	Jinyinhua
1784	HBIN041495	quercetin	Flavonoid	CYP1A1	Jinyinhua
1785	HBIN041495	quercetin	Flavonoid	NR1I2	Jinyinhua
1786	HBIN041495	quercetin	Flavonoid	PARP1	Jinyinhua
1787	HBIN041495	quercetin	Flavonoid	CYP1B1	Jinyinhua
1788	HBIN041495	quercetin	Flavonoid	MAOB	Jinyinhua
1789	HBIN041495	quercetin	Flavonoid	VEGFA	Jinyinhua
1790	HBIN041495	quercetin	Flavonoid	MPO	Jinyinhua
1791	HBIN041495	quercetin	Flavonoid	RB1	Jinyinhua
1792	HBIN041495	quercetin	Flavonoid	EGF	Jinyinhua
1793	HBIN041495	quercetin	Flavonoid	NFKBIA	Jinyinhua
1794	HBIN041495	quercetin	Flavonoid	BIRC5	Jinyinhua
1795	HBIN041495	quercetin	Flavonoid	PPARG	Jinyinhua
1796	HBIN041495	quercetin	Flavonoid	DPP4	Jinyinhua
1797	HBIN041495	quercetin	Flavonoid	HAS2	Jinyinhua
1798	HBIN041495	quercetin	Flavonoid	ERBB2	Jinyinhua
1799	HBIN041495	quercetin	Flavonoid	CHEK1	Jinyinhua
1800	HBIN041495	quercetin	Flavonoid	CXCL8	Jinyinhua
1801	HBIN041495	quercetin	Flavonoid	INSR	Jinyinhua
1802	HBIN041495	quercetin	Flavonoid	CYP3A4	Jinyinhua
1803	HBIN041495	quercetin	Flavonoid	IL1B	Jinyinhua
1804	HBIN041495	quercetin	Flavonoid	CDK1	Jinyinhua
1805	HBIN041495	quercetin	Flavonoid	EIF6	Jinyinhua
1806	HBIN041495	quercetin	Flavonoid	DPEP1	Jinyinhua
1807	HBIN041495	quercetin	Flavonoid	BMP2	Jinyinhua
1808	HBIN041495	quercetin	Flavonoid	IL6	Jinyinhua
1809	HBIN041495	quercetin	Flavonoid	KCNH2	Jinyinhua
1810	HBIN041495	quercetin	Flavonoid	E2F1	Jinyinhua
1811	HBIN041495	quercetin	Flavonoid	SPP1	Jinyinhua
1812	HBIN041495	quercetin	Flavonoid	TOP2A	Jinyinhua
1813	HBIN041495	quercetin	Flavonoid	MGAM	Jinyinhua
1814	HBIN041495	quercetin	Flavonoid	NOS2	Jinyinhua
1815	HBIN041495	quercetin	Flavonoid	CHUK	Jinyinhua
1816	HBIN041495	quercetin	Flavonoid	PRKCA	Jinyinhua
1817	HBIN041495	quercetin	Flavonoid	MYC	Jinyinhua
1818	HBIN041495	quercetin	Flavonoid	RASA1	Jinyinhua
1819	HBIN041495	quercetin	Flavonoid	XDH	Jinyinhua
1820	HBIN041495	quercetin	Flavonoid	VCAM1	Jinyinhua
1821	HBIN041495	quercetin	Flavonoid	PIM1	Jinyinhua
1822	HBIN041495	quercetin	Flavonoid	NOS3	Jinyinhua
1823	HBIN041495	quercetin	Flavonoid	EGFR	Jinyinhua
1824	HBIN041495	quercetin	Flavonoid	CYP1A2	Jinyinhua
1825	HBIN041495	quercetin	Flavonoid	AKR1B1	Jinyinhua
1826	HBIN041495	quercetin	Flavonoid	RASSF1	Jinyinhua
1827	HBIN041495	quercetin	Flavonoid	IGFBP3	Jinyinhua
1828	HBIN041495	quercetin	Flavonoid	CD40LG	Jinyinhua
1829	HBIN041495	quercetin	Flavonoid	GSTM2	Jinyinhua
1830	HBIN041495	quercetin	Flavonoid	CASP8	Jinyinhua
1831	HBIN041495	quercetin	Flavonoid	PTEN	Jinyinhua
1832	HBIN041495	quercetin	Flavonoid	NQO1	Jinyinhua
1833	HBIN041495	quercetin	Flavonoid	IFNG	Jinyinhua
1834	HBIN041495	quercetin	Flavonoid	COL3A1	Qinghao
1835	HBIN041495	quercetin	Flavonoid	ESR1	Qinghao
1836	HBIN041495	quercetin	Flavonoid	JUN	Qinghao
1837	HBIN041495	quercetin	Flavonoid	SULT1E1	Qinghao
1838	HBIN041495	quercetin	Flavonoid	TP53	Qinghao
1839	HBIN041495	quercetin	Flavonoid	GABRA1	Qinghao
1840	HBIN041495	quercetin	Flavonoid	PTGS1	Qinghao
1841	HBIN041495	quercetin	Flavonoid	STAT1	Qinghao
1842	HBIN041495	quercetin	Flavonoid	CXCL10	Qinghao
1843	HBIN041495	quercetin	Flavonoid	AKT1	Qinghao
1844	HBIN041495	quercetin	Flavonoid	AHR	Qinghao
1845	HBIN041495	quercetin	Flavonoid	PLAU	Qinghao
1846	HBIN041495	quercetin	Flavonoid	DUOX2	Qinghao
1847	HBIN041495	quercetin	Flavonoid	TOP1	Qinghao
1848	HBIN041495	quercetin	Flavonoid	RELA	Qinghao
1849	HBIN041495	quercetin	Flavonoid	RUNX1T1	Qinghao
1850	HBIN041495	quercetin	Flavonoid	E2F2	Qinghao
1851	HBIN041495	quercetin	Flavonoid	PON1	Qinghao
1852	HBIN041495	quercetin	Flavonoid	ABCG2	Qinghao
1853	HBIN041495	quercetin	Flavonoid	POR	Qinghao
1854	HBIN041495	quercetin	Flavonoid	SOD3	Qinghao
1855	HBIN041495	quercetin	Flavonoid	BCL2L1	Qinghao
1856	HBIN041495	quercetin	Flavonoid	HSPB1	Qinghao
1857	HBIN041495	quercetin	Flavonoid	PRSS1	Qinghao
1858	HBIN041495	quercetin	Flavonoid	RUNX2	Qinghao
1859	HBIN041495	quercetin	Flavonoid	DCAF5	Qinghao
1860	HBIN041495	quercetin	Flavonoid	ACHE	Qinghao
1861	HBIN041495	quercetin	Flavonoid	HIF1A	Qinghao
1862	HBIN041495	quercetin	Flavonoid	SOD1	Qinghao
1863	HBIN041495	quercetin	Flavonoid	MMP9	Qinghao
1864	HBIN041495	quercetin	Flavonoid	ACACA	Qinghao
1865	HBIN041495	quercetin	Flavonoid	TNF	Qinghao
1866	HBIN041495	quercetin	Flavonoid	MAPK14	Qinghao
1867	HBIN041495	quercetin	Flavonoid	CCL2	Qinghao
1868	HBIN041495	quercetin	Flavonoid	PTGS2	Qinghao
1869	HBIN041495	quercetin	Flavonoid	ACAA2	Qinghao
1870	HBIN041495	quercetin	Flavonoid	MMP2	Qinghao
1871	HBIN041495	quercetin	Flavonoid	GJA1	Qinghao
1872	HBIN041495	quercetin	Flavonoid	CAV1	Qinghao
1873	HBIN041495	quercetin	Flavonoid	NPEPPS	Qinghao
1874	HBIN041495	quercetin	Flavonoid	PPARD	Qinghao
1875	HBIN041495	quercetin	Flavonoid	NR1I3	Qinghao
1876	HBIN041495	quercetin	Flavonoid	CXCL11	Qinghao
1877	HBIN041495	quercetin	Flavonoid	HSPA5	Qinghao
1878	HBIN041495	quercetin	Flavonoid	TGFB1	Qinghao
1879	HBIN041495	quercetin	Flavonoid	CTSD	Qinghao
1880	HBIN041495	quercetin	Flavonoid	CRP	Qinghao
1881	HBIN041495	quercetin	Flavonoid	MAPK3	Qinghao
1882	HBIN041495	quercetin	Flavonoid	GSTM1	Qinghao
1883	HBIN041495	quercetin	Flavonoid	MAPK1	Qinghao
1884	HBIN041495	quercetin	Flavonoid	F3	Qinghao
1885	HBIN041495	quercetin	Flavonoid	CHEK2	Qinghao
1886	HBIN041495	quercetin	Flavonoid	IRF1	Qinghao
1887	HBIN041495	quercetin	Flavonoid	CDK2	Qinghao
1888	HBIN041495	quercetin	Flavonoid	AHSA1	Qinghao
1889	HBIN041495	quercetin	Flavonoid	HK2	Qinghao
1890	HBIN041495	quercetin	Flavonoid	PCOLCE	Qinghao
1891	HBIN041495	quercetin	Flavonoid	THBD	Qinghao
1892	HBIN041495	quercetin	Flavonoid	HERC5	Qinghao
1893	HBIN041495	quercetin	Flavonoid	CLDN4	Qinghao
1894	HBIN041495	quercetin	Flavonoid	PLAT	Qinghao
1895	HBIN041495	quercetin	Flavonoid	GSK3B	Qinghao
1896	HBIN041495	quercetin	Flavonoid	GSTP1	Qinghao
1897	HBIN041495	quercetin	Flavonoid	NKX3-1	Qinghao
1898	HBIN041495	quercetin	Flavonoid	SLC2A4	Qinghao
1899	HBIN041495	quercetin	Flavonoid	F7	Qinghao
1900	HBIN041495	quercetin	Flavonoid	BAX	Qinghao
1901	HBIN041495	quercetin	Flavonoid	ELK1	Qinghao
1902	HBIN041495	quercetin	Flavonoid	MMP1	Qinghao
1903	HBIN041495	quercetin	Flavonoid	CASP3	Qinghao
1904	HBIN041495	quercetin	Flavonoid	SELE	Qinghao
1905	HBIN041495	quercetin	Flavonoid	HSF1	Qinghao
1906	HBIN041495	quercetin	Flavonoid	NCF1	Qinghao
1907	HBIN041495	quercetin	Flavonoid	HMOX1	Qinghao
1908	HBIN041495	quercetin	Flavonoid	SERPINE1	Qinghao
1909	HBIN041495	quercetin	Flavonoid	CDKN2A	Qinghao
1910	HBIN041495	quercetin	Flavonoid	CCNB1	Qinghao
1911	HBIN041495	quercetin	Flavonoid	IL10	Qinghao
1912	HBIN041495	quercetin	Flavonoid	BCL2	Qinghao
1913	HBIN041495	quercetin	Flavonoid	RXRA	Qinghao
1914	HBIN041495	quercetin	Flavonoid	POLD1	Qinghao
1915	HBIN041495	quercetin	Flavonoid	DIO1	Qinghao
1916	HBIN041495	quercetin	Flavonoid	FOS	Qinghao
1917	HBIN041495	quercetin	Flavonoid	IGF2	Qinghao
1918	HBIN041495	quercetin	Flavonoid	PSMD3	Qinghao
1919	HBIN041495	quercetin	Flavonoid	ADRB2	Qinghao
1920	HBIN041495	quercetin	Flavonoid	PPARA	Qinghao
1921	HBIN041495	quercetin	Flavonoid	NCOA2	Qinghao
1922	HBIN041495	quercetin	Flavonoid	CASP9	Qinghao
1923	HBIN041495	quercetin	Flavonoid	COL1A1	Qinghao
1924	HBIN041495	quercetin	Flavonoid	NFE2L2	Qinghao
1925	HBIN041495	quercetin	Flavonoid	CCNA2	Qinghao
1926	HBIN041495	quercetin	Flavonoid	ALOX5	Qinghao
1927	HBIN041495	quercetin	Flavonoid	AR	Qinghao
1928	HBIN041495	quercetin	Flavonoid	ESR2	Qinghao
1929	HBIN041495	quercetin	Flavonoid	PTGER3	Qinghao
1930	HBIN041495	quercetin	Flavonoid	IL2	Qinghao
1931	HBIN041495	quercetin	Flavonoid	RAF1	Qinghao
1932	HBIN041495	quercetin	Flavonoid	IL1A	Qinghao
1933	HBIN041495	quercetin	Flavonoid	CDKN1A	Qinghao
1934	HBIN041495	quercetin	Flavonoid	PRKCB	Qinghao
1935	HBIN041495	quercetin	Flavonoid	CAT	Qinghao
1936	HBIN041495	quercetin	Flavonoid	MMP3	Qinghao
1937	HBIN041495	quercetin	Flavonoid	ODC1	Qinghao
1938	HBIN041495	quercetin	Flavonoid	CA2	Qinghao
1939	HBIN041495	quercetin	Flavonoid	ACP3	Qinghao
1940	HBIN041495	quercetin	Flavonoid	CXCL2	Qinghao
1941	HBIN041495	quercetin	Flavonoid	ERBB3	Qinghao
1942	HBIN041495	quercetin	Flavonoid	CCND1	Qinghao
1943	HBIN041495	quercetin	Flavonoid	ICAM1	Qinghao
1944	HBIN041495	quercetin	Flavonoid	SCN5A	Qinghao
1945	HBIN041495	quercetin	Flavonoid	CYP1A1	Qinghao
1946	HBIN041495	quercetin	Flavonoid	NR1I2	Qinghao
1947	HBIN041495	quercetin	Flavonoid	PARP1	Qinghao
1948	HBIN041495	quercetin	Flavonoid	CYP1B1	Qinghao
1949	HBIN041495	quercetin	Flavonoid	MAOB	Qinghao
1950	HBIN041495	quercetin	Flavonoid	VEGFA	Qinghao
1951	HBIN041495	quercetin	Flavonoid	MPO	Qinghao
1952	HBIN041495	quercetin	Flavonoid	RB1	Qinghao
1953	HBIN041495	quercetin	Flavonoid	EGF	Qinghao
1954	HBIN041495	quercetin	Flavonoid	NFKBIA	Qinghao
1955	HBIN041495	quercetin	Flavonoid	BIRC5	Qinghao
1956	HBIN041495	quercetin	Flavonoid	PPARG	Qinghao
1957	HBIN041495	quercetin	Flavonoid	DPP4	Qinghao
1958	HBIN041495	quercetin	Flavonoid	HAS2	Qinghao
1959	HBIN041495	quercetin	Flavonoid	ERBB2	Qinghao
1960	HBIN041495	quercetin	Flavonoid	CHEK1	Qinghao
1961	HBIN041495	quercetin	Flavonoid	CXCL8	Qinghao
1962	HBIN041495	quercetin	Flavonoid	INSR	Qinghao
1963	HBIN041495	quercetin	Flavonoid	CYP3A4	Qinghao
1964	HBIN041495	quercetin	Flavonoid	IL1B	Qinghao
1965	HBIN041495	quercetin	Flavonoid	CDK1	Qinghao
1966	HBIN041495	quercetin	Flavonoid	EIF6	Qinghao
1967	HBIN041495	quercetin	Flavonoid	DPEP1	Qinghao
1968	HBIN041495	quercetin	Flavonoid	BMP2	Qinghao
1969	HBIN041495	quercetin	Flavonoid	IL6	Qinghao
1970	HBIN041495	quercetin	Flavonoid	KCNH2	Qinghao
1971	HBIN041495	quercetin	Flavonoid	E2F1	Qinghao
1972	HBIN041495	quercetin	Flavonoid	SPP1	Qinghao
1973	HBIN041495	quercetin	Flavonoid	TOP2A	Qinghao
1974	HBIN041495	quercetin	Flavonoid	MGAM	Qinghao
1975	HBIN041495	quercetin	Flavonoid	NOS2	Qinghao
1976	HBIN041495	quercetin	Flavonoid	CHUK	Qinghao
1977	HBIN041495	quercetin	Flavonoid	PRKCA	Qinghao
1978	HBIN041495	quercetin	Flavonoid	MYC	Qinghao
1979	HBIN041495	quercetin	Flavonoid	RASA1	Qinghao
1980	HBIN041495	quercetin	Flavonoid	XDH	Qinghao
1981	HBIN041495	quercetin	Flavonoid	VCAM1	Qinghao
1982	HBIN041495	quercetin	Flavonoid	PIM1	Qinghao
1983	HBIN041495	quercetin	Flavonoid	NOS3	Qinghao
1984	HBIN041495	quercetin	Flavonoid	EGFR	Qinghao
1985	HBIN041495	quercetin	Flavonoid	CYP1A2	Qinghao
1986	HBIN041495	quercetin	Flavonoid	AKR1B1	Qinghao
1987	HBIN041495	quercetin	Flavonoid	RASSF1	Qinghao
1988	HBIN041495	quercetin	Flavonoid	IGFBP3	Qinghao
1989	HBIN041495	quercetin	Flavonoid	CD40LG	Qinghao
1990	HBIN041495	quercetin	Flavonoid	GSTM2	Qinghao
1991	HBIN041495	quercetin	Flavonoid	CASP8	Qinghao
1992	HBIN041495	quercetin	Flavonoid	PTEN	Qinghao
1993	HBIN041495	quercetin	Flavonoid	NQO1	Qinghao
1994	HBIN041495	quercetin	Flavonoid	IFNG	Qinghao
1995	HBIN041495	quercetin	Flavonoid	COL3A1	Huangqin
1996	HBIN041495	quercetin	Flavonoid	ESR1	Huangqin
1997	HBIN041495	quercetin	Flavonoid	JUN	Huangqin
1998	HBIN041495	quercetin	Flavonoid	SULT1E1	Huangqin
[truncated: 2,158 more rows]
