# Supplementary material for: Network-based pharmacology and UHPLC-Q-Exactive-Orbitrap-MS reveal Jinhua Qinggan granule's mechanism in reducing cellular inflammation in COVID-19
Source: Front Immunol. 2024 Jul 4;15:1382524. doi: 10.3389/fimmu.2024.1382524 (PMC11254672; doi:10.3389/fimmu.2024.1382524)
Supplement: Supplementary file 3 [file Table_3.xlsx]

## Sheet: Sheet1
Donor	Age Sex (years)	Days from reported symptom onset	Days from closest reported or measured fever	Immuno- modulators prior to blood draw	Admission level	Ventilated/ ARDS?	Days intubated	Days paralyzed	PaO,/Fl0,on icu admission	Clinical outcome
C1	60-69 M	9 11	9 11	Azithromycin	ICU	No Yes	17	2	91	Discharged to rehak on room air
C2	40-49 M	16	16		ICU	No				Discharged home
C3	30-39 M	9	9	Azithromycin	ICU	Yes	25	4	100	Tracheostomy, prolonged ICU and hospital course
C4	30-39 M	9	9	Azithromycin	ICU	Yes	16	3	71	Discharged home
C5	50-59 M	15	1		ICU	No				Discharged home
C6	>80 M	2	No fever		ICU	Yes	11	0	126	Deceased
C7	20-29 M	12	No fever		Floor	No				Discharged home
H1	49 F	-	-	-	-	-	-	-	-	-
H2	49 M	-	-	-	-	-	-	-	-	-
H3	36 F	-	-	-	-	-	-	-	-	-
H4	49 M	-	-	-	-	-	-	-	-	-
H5	48 M	-	-	-	-	-	-	-	-	-
H6	37 M	-	-	-	-	-	-	-	-	-
